# Binding of Calcium and Magnesium to Cardiac Troponin C

Rayani K<sup>1</sup>, Seffernick JT<sup>2</sup>, Li YA<sup>1</sup>, Davis JP<sup>3</sup>, Spuches AM<sup>4</sup>, Van Petegem F<sup>5</sup>, Solaro RJ<sup>6</sup>, Lindert S<sup>2</sup>, and Tibbits GF<sup>1, 7, 8</sup>

<sup>1</sup> Molecular Cardiac Physiology Group, Simon Fraser University, Burnaby, BC V5A 1S6, Canada.

<sup>2</sup> Department of Chemistry and Biochemistry, Ohio State University, Columbus, OH 43210, United States.

<sup>3</sup> Department of Physiology and Cell Biology, The Ohio State University, Columbus, OH 43210, United States.

<sup>4</sup> Department of Chemistry, East Carolina University, 300 Science and Technology, Greenville, NC 27858, United States.

<sup>5</sup> Department of Biochemistry and Molecular Biology, The University of British Columbia, Vancouver, BC V6T 1Z3, Canada.

<sup>6</sup> Department of Physiology and Biophysics and the Center for Cardiovascular Research, College of Medicine, University of Illinois at Chicago, Chicago, IL, United States.

<sup>7</sup> Department of Molecular Biology and Biochemistry, Simon Fraser University, Burnaby, BC V5A 1S6, Canada.

<sup>8</sup> BC Children's Hospital Research Institute, Vancouver, BC V5Z 4H4, Canada.

Running Title: Ca and Mg binding to cTnC

Key Words: Contractility, Myofilament, ITC, Calorimetry, MD Simulation, Thermodynamic Integration, Molecular Dynamics

## Abstract

Cardiac troponin C (cTnC) is the  $\text{Ca}^{2+}$ -sensing component of the thin filament. It contains structural sites (III/IV) which bind both  $\text{Ca}^{2+}$  and  $\text{Mg}^{2+}$ , and a regulatory site (II) that has been thought to bind only  $\text{Ca}^{2+}$ . The latter binding initiates a series of conformational changes that culminate in force production.

We have quantified the interaction between site II and  $\text{Ca}^{2+}/\text{Mg}^{2+}$  through Isothermal Titration Calorimetry and Thermodynamic Integration simulations. Direct and competitive binding titrations using wild type and a double mutant that significantly reduces binding to site II demonstrated that physiologically relevant concentrations of both  $\text{Ca}^{2+}/\text{Mg}^{2+}$  interact with the same locus. Cytosolic free  $\text{Mg}^{2+}$  (~1 mM) could occupy a significant population of available site II, as this concentration of  $\text{Mg}^{2+}$  decreased the affinity for  $\text{Ca}^{2+}$  1.4-fold.

Interaction of  $\text{Mg}^{2+}$  with site II of cTnC likely has important functional consequences for the heart at baseline and in diseased states which decrease or increase availability of  $\text{Mg}^{2+}$  such as secondary hyperparathyroidism or ischemia, respectively.

## Introduction

Cardiac troponin (cTn) is a heterotrimeric complex that includes components for: Ca<sup>2+</sup> binding (troponin C – cTnC), inhibition of contraction (troponin I – cTnI), and tropomyosin binding (troponin T – cTnT) (Parmacek and Solaro 2004). Ca<sup>2+</sup> binding to site II of cTnC is the precursor to a series of structural perturbations in the thin filament (TF) that culminate in a strong force generating reaction between the actin filament and myosin heads (Kawasaki and van Eerd 1972, Murray and Kay 1972, Potter and Gergely 1975, Filatov, Katrukha et al. 1999, Parmacek and Solaro 2004).

cTnC is a 161-amino acid protein composed of 9 helices (N and A-H), which form 4 helix-loop-helix binding motifs (sites I-IV). Within these domains, residues in positions 1 (+x), 3 (+y), 5 (+z), 7 (-y), 9 (-x), and 12 (-z) contain oxygen atoms arranged in a pentagonal bipyramid allowing for coordination of metal cations (**Figure S1**) (Strynadka and James 1989, Yap, Ames et al. 1999, Lewit-Bentley and Rety 2000). Skeletal muscle troponin TnC (sTnC) has 4 functional Ca<sup>2+</sup> binding motifs (Seamon, Hartshorne et al. 1977, Ebashi, Nonomura et al. 1980). Cardiac TnC (cTnC) has a similar overall structure but a slightly different primary sequence. The insertion of a valine at residue 28, along with the substitutions D29L and D31A have rendered site I of cTnC non-receptive to Ca<sup>2+</sup> binding (van Eerd and Takahshi 1976, Farah and Reinach 1995).

Ca<sup>2+</sup> binding to sites III and IV in the C-domain of cTnC occurs with high affinity ( $\sim 10^7 \text{ M}^{-1}$ ) ( $\sim 10$ x higher than the N-domain) and a slow exchange rate ( $\sim 100$ x slower than binding to the N-domain). Given the abundance of contractile filaments throughout cardiomyocytes, cTnC buffers a significant portion of cytosolic Ca<sup>2+</sup> (Johnson, Charlton et al. 1979, Johnson, Nakkula et al. 1994, Schober, Huke et al. 2012). At resting free cytosolic Ca<sup>2+</sup> concentrations, sites III and IV are usually saturated with Ca<sup>2+</sup> (Bers 2000). Mg<sup>2+</sup> also binds at sites III and IV, but with lower affinity ( $K_A \sim 10^4 \text{ M}^{-1}$ ) (Potter and Gergely 1975). However, the cytosolic concentration of Mg<sup>2+</sup> allows this cation to compete with and reduce the binding of Ca<sup>2+</sup> to the “structural” sites (Leavis and Kraft 1978, Robertson, Johnson et al. 1981). The binding of Ca<sup>2+</sup>/Mg<sup>2+</sup> to sites III and IV alters the structure of TnC and is a prerequisite for tethering to the rest of the TF (Sturtevant 1977, Tikunova and Davis 2004).

The C-domain of cTnC is linked to the N-domain by a linker region composed of a nine turn  $\alpha$ -helix (Sundaralingam, Bergstrom et al. 1985, Sia, Li et al. 1997). Within the N-domain (N-cTnC), Ca<sup>2+</sup> binds the low affinity ( $\sim 10^5 \text{ M}$ ) site II such that this site is only partially occupied at diastolic free Ca<sup>2+</sup> concentrations ( $\sim 0.1 \mu\text{M}$ ) (Cheung, Tillotson et al. 1989). The degree of occupancy is significantly higher at systolic free Ca<sup>2+</sup> concentrations ( $\sim 0.5 - 1.2 \mu\text{M}$ ) which follow Ca<sup>2+</sup>-induced Ca<sup>2+</sup>-release (Kirschenlohr, Grace et al. 2000). Ca<sup>2+</sup> binding to site II provides the free energy to allow exposure of a hydrophobic pocket, which is otherwise less favorable (Gifford, Walsh et al. 2007, Bowman and

Lindert 2018). Helices B and C (BC domain) move away from helices N, A, and D (NAD domain) to expose the hydrophobic cleft, with the short anti-parallel  $\beta$ -sheet between EF-hands I and II acting as a hinge (Herzberg and James 1985, Slupsky and Sykes 1995, Houdusse, Love et al. 1997). Binding of the “switch peptide” TnI<sub>147-163</sub> to this pocket facilitates exposure of this hydrophobic region (Sia, Li et al. 1997, Spyrapoulos, Li et al. 1997, Li, Spyrapoulos et al. 1999).

A persistent and under-investigated question is the role of cellular Mg<sup>2+</sup> in the signaling of activation by cTnC. Of the total cytosolic [Mg<sup>2+</sup>]<sub>i</sub> (~10 mM), the majority is bound to cellular components such as ATP with only ~0.5 – 1.0 mM being freely available in the cytosol (Romani and Scarpa 1992, Dai, Friedman et al. 1997). In conditions with diminished buffering capacity, such as ATP depleted states, the free [Mg<sup>2+</sup>] can increase significantly (Hongo, Konishi et al. 1994, Tessman and Romani 1998) prior to being extruded from the cell (Laires, Monteiro et al. 2004), but it could also compete with Ca<sup>2+</sup> for binding to cTnC.

Increase in Mg-ATP in both skeletal and cardiac tissue decreases the Ca<sup>2+</sup> sensitivity of skinned fibers (Godt 1974, Best, Donaldson et al. 1977, Godt and Morgan 1984). Further evidence has been obtained through fluorescence-based studies of isolated cTnC (Potter, Robertson et al. 1981, Ogawa 1985, Zot and Potter 1987, Morimoto 1991, Francois, Gerday et al. 1993, She, Dong et al. 1998), the Tn complex (Potter, Robertson et al. 1981, Zot and Potter 1987), and reconstituted fibers (Zot and Potter 1987, Allen, Yates et al. 1992) where Mg<sup>2+</sup> appears to decrease Ca<sup>2+</sup> sensitivity. In isolated TnC, the K<sub>A</sub> of the low affinity sites (III/IV) for Ca<sup>2+</sup> and Mg<sup>2+</sup> was measured to be on the order of 10<sup>6</sup> M<sup>-1</sup> and 10<sup>2</sup> M<sup>-1</sup>, respectively (Ogawa 1985).

Interaction of Ca<sup>2+</sup>/Mg<sup>2+</sup> with sites III/IV results in a large change in enthalpy ( $\Delta H$ ), in contrast to changes resulting from site I/II binding which are small by comparison. Detection of heat changes associated with the interactions of metal ions and proteins is both challenging and highly technique dependent such that small changes may be deemed negligible (Yamada 1978, Yamada and Kometani 1982, Kometani and Yamada 1983). Experiments used to study this system decades ago were limited by the technology of the time. In contrast, modern Isothermal titration calorimetry (ITC) is a sensitive method to that can be used to define the thermodynamic parameters of binding without the use of labelling methods that could interfere. Modern ITC allows for the study of single binding sites within isolated protein domains and can be used to detect heat changes as small as 0.1  $\mu$ cal (Yamada 2003, Wilcox 2008, Grossoehme, Spuches et al. 2010, Sacco, Skowronsky et al. 2012).

We have used ITC to explore the binding of Mg<sup>2+</sup> and Ca<sup>2+</sup> to site II at the level of N-cTnC and full-length cTnC. Competitive binding to the N-domain and mutations in the site II caused a reduction in apparent affinity, indicating interaction of both cations with the same locus in the protein. In full-

length cTnC,  $Mg^{2+}$  competed with and reduced  $Ca^{2+}$  binding to all three sites. These findings further corroborate and expand upon what has been shown by a few labs, but the findings are largely ignored by most; the role of  $Mg^{2+}$  in modulating the  $Ca^{2+}$ -sensitivity of force production in cardiomyocytes is one which merits further discussion.

## Methods

### Construct preparation and protein expression

The *TNNC1* gene (Uniprot ID P63316) had previously been cloned into pET21a(+) vector and had a stop codon inserted at residue 90 to create the N-cTnC construct using the Phusion site-directed mutagenesis protocol (Thermo Scientific). This construct was transformed into the BL21(DE3) expression strain. The D76A/D73A construct was made using site-directed mutagenesis carried out by GenScript (New Jersey, USA). Expression and purification of all constructs were carried out as described previously (Stevens, Rayani et al. 2016, Stevens, Rayani et al. 2017). In brief, 100 mL of lysogeny broth (LB) was supplemented with 50 µg/mL ampicillin and a glycerol stock stab and grown over-night at a shaking speed of 250 rpm and 37°C. In the morning, the same conditions were provided to 1 L cultures that were grown for ~3 hrs to an OD<sub>600</sub> of 0.8 – 1.0 followed by induction with β-D-1-thiogalactopyranoside (IPTG). After 3 hrs, the cells were harvested by centrifugation and stored at -80 °C.

### Protein purification

The cell pellet was thawed and suspended in 50 mM Tris-Cl pH 8.0, 5 mM ethylenediamine-tetraacetic acid (EDTA) and sonicated on ice, 5 times 30 sec each, with intervals of rest between to avoid overheating. The lysate was centrifuged for 15 mins at 30,000 ×g and the supernatant separated twice to remove all cell debris. The supernatant was applied to a fast-flow Q-Sepharose column pre-equilibrated with the suspension buffer and 1 mM dithiothreitol (DTT). The protein was eluted from the column by applying a 180 mL ramp gradient to the same buffer supplemented with 0.5 M NaCl. The gradient was applied using an AKTA FPLC machine that was also used to fractionate the eluted samples. Following analysis by SDS-PAGE, the samples containing N-cTnC were pooled and concentrated using Amicon centrifugal concentrators with a 3 KDa molecular weight cut-off (Millipore).

The full-length protein was purified in the same way, with the addition of a 30% ammonium sulphate following the sonication step. Centrifugation was then used to remove insoluble components and the supernatant was then dialyzed overnight against 4 L of column-buffer containing 50 mM Tris-Cl pH 8.0 and 100 mM NaCl.

The concentrated protein was then applied to a HiPrep 26/60 Sephacryl S-100 column (DEAE FF) (GE healthcare) which was equilibrated with the re-suspension buffer supplemented with 100 mM NaCl. SDS-PAGE analysis of the fractions was used to identify and pool those containing cTnC. The protein was stored at -80 °C prior to pre-ITC dialysis.

## Dialysis and ITC experiments

To generate the apo-state protein, troponin C was first dialyzed against 2 L of 50 mM HEPES pH 7.2, 150 mM KCl, 2 mM EDTA, and 15 mM  $\beta$ -mercaptoethanol (BME), followed by another dialysis against the same buffer. Each of these dialysis steps was completed at 4°C for a minimum of 4 hrs. A third dialysis was performed for a minimum of 16 hrs overnight against 2 L of 50 mM HEPES pH 7.2, 150 mM KCl, and 2 mM EDTA. An extinction coefficient of 1490 M<sup>-1</sup>cm<sup>-1</sup> and 4595 M<sup>-1</sup>cm<sup>-1</sup>, and a molecular weight of 10.1 kDa and 18.4 kDa were used to determine protein concentration for the N-cTnC and full length cTnC constructs, respectively, by 280 nm UV-vis spectroscopy using a NanoDrop 2000 spectrophotometer (Thermo Scientific). The final dialysis buffer was used to dilute the protein samples to a final concentration of 200  $\mu$ M for the N-terminal construct and 150  $\mu$ M for full length cTnC as described previously (Stevens, Rayani et al. 2017).

## Experimental Protocols

### *Full-length cTnC*

Standard 1.0 M CaCl<sub>2</sub> and MgCl<sub>2</sub> stock solutions (Sigma, USA) were serially diluted in the final dialysis buffer to produce 6 mM Ca<sup>2+</sup> and 40 mM Mg<sup>2+</sup> for the full length cTnC titrations. 6 mM Ca<sup>2+</sup> was titrated into 100  $\mu$ M apo-state full-length human cTnC as the baseline condition. The data were fit with a two sets-of-binding-sites model. The same amount of protein was diluted in the ITC buffer and used for all subsequent conditions that were fit with the same model. Supra-physiological concentrations Ca<sup>2+</sup> were selected for the pre-incubation experiments and justified as the goals of these experiments were not violated. The goals of these experiments were to explore possible competition between Ca<sup>2+</sup> and Mg<sup>2+</sup> in binding to cTnC and N-cTnC. Higher concentrations could thus be used to observe clearer results. Also, the amounts of cTnC and N-cTnC are above what is available in the cell and the affinity of their binding sites is lowered as they exist in isolation in these experiments ie. their affinities would be elevated by the presence of other cTn complex proteins. The concentrations of Mg<sup>2+</sup> pre-incubated (1 and 3 mM) is not far beyond what would be expected in normal cellular conditions.

### *N-terminal cTnC*

The same standards were used to produce 4 mM Ca<sup>2+</sup> and 20 mM Mg<sup>2+</sup> titrants for the N-cTnC experiments. 4 mM Ca<sup>2+</sup> was titrated into 200  $\mu$ M apo-state N-cTnC as the baseline condition with subsequent titrations using the same amount of protein. The isotherms were all fit with a single binding site model.

## ***Titration*s**

The ITC experiments were carried out in a MicroCal ITC200 instrument (Malvern, UK). Repeat titrations were used to ensure reproducibility. The sample cell was set at 25 °C, 200 µL of the protein was loaded and the experiment was carried out at the same temperature. For the N-terminal constructs, 19 injections of the titrant were used with the first being a dummy injection of 0.8 µL and the subsequent 18 injections, 2 µL each. For the full-length constructs, the same volume of sample was titrated with a dummy injection of 0.5 µL and 38 injections of 1 µL. The time interval between injections was 120 sec and stirring speed was set at 1,000 rpm throughout each experiment.

## **Analysis of results**

Titration data obtained from ITC were fit using Origin 8.0 (OriginLab, Northampton, MA) to calculate the thermodynamic parameters using a least-squares algorithm by the software. In this method, if multiple ligands were simultaneously present in the reaction mixture, an “apparent affinity” was determined for the injected titrant. Origin also allows for fitting of more complex models of interactions which were utilized in the case of multiple binding sites for the full length cTnC experiments.

When fitting the data for the N-cTnC constructs (apart from the Ca<sup>2+</sup> into Apo-state N-cTnC condition), the N associated with each interaction was necessarily constrained to equal 1.00 to facilitate curve fitting without altering protein concentration. The baseline condition was repeated daily to monitor fluctuations in concentration of properly folded and functional protein.

Protein concentration plays a large role in determination of affinity. The concentration of the titrant may be affected by pipetting errors, albeit this effect is normally minimal. The ratio of the ligand to titrant in the single binding site condition (as given by the stoichiometry –  $n$ ) is a measure of the functional moles of protein and was approximately 1.00 in all the N-cTnC titrations. Given the method of concentration determination, the number of binding sites, cooperativity, and the variable binding strength of each titrants, the N cannot be used in the same way for the full-length cTnC experiments. Therefore, the values presented can be compared between conditions, but care should be taken when comparing these to other systems. Ease of manipulation of the N-cTnC/cTnC system contrasts with those that include the cTn/TF. Thus, the binding parameters measured here may not translate in absolute term when cTnC is incorporated into a more complex system.



## Thermodynamic Integration (TI)

Starting from the representative model of PDB:1AP4 (Spyracopoulos, Li et al. 1997), that contains N-cTnC with a single  $\text{Ca}^{2+}$  ion bound, the system was solvated with a 12 Å padded TIP3P water box and neutralized with  $\text{Na}^+$  in Amber16 (D.A. Case, R.M. Betz et al. 2016). The system was also prepared similarly for only the  $\text{Ca}^{2+}$  ion in a 12 Å padded TIP3P water box. The alchemical thermodynamic cycle used for ligand binding was described in detail previously (Leelananda and Lindert 2016). In short, TI was performed using the following three steps for  $\text{Ca}^{2+}$  in protein: turn on restraints, turn off charge, and turn off van der Waals forces. The specific distance restraints used in all systems can be found in **Table S1**. Additionally, TI was performed for the following two steps for  $\text{Ca}^{2+}$  in water: turn off charge and turn off van der Waals forces. Each step of the thermodynamic cycle was performed with the coupling parameter ( $\lambda$ ) ranging from 0.0-1.0 in increments of 0.1. For each simulation, the system was minimized (2000 cycles) and heated (0.5 ns) before the 5 ns production run at 300 K using the ff14SB force field (Maier, Martinez et al. 2015). These calculations were also performed on the D67A/D73A mutated system. The mutations were imposed on the 1AP4 representative model using PyMOL (L DeLano 2002).

For the calculation of  $\text{Mg}^{2+}$  binding affinity,  $\text{Ca}^{2+}$  was replaced with  $\text{Mg}^{2+}$  in the 1AP4 representative model since no  $\text{Mg}^{2+}$ -bound N-cTnC structure was available in the protein databank. In order to generate more accurate restraints and starting coordinates for the TI calculations, a minimization was performed on the structure in Amber (2000 cycles). Following the minimization, TI simulations were run similarly as for  $\text{Ca}^{2+}$ . However, due to previously documented errors in the default  $\text{Mg}^{2+}$  parameters, the  $\Delta G_{\text{solvation}}$ -optimized  $\text{Mg}^{2+}$  parameters from Li et. al. were used (Li, Roberts et al. 2013, Panteva, Giambasu et al. 2015). These calculations were also performed on the D67A/D73A mutated system.

To calculate absolute binding affinities for the ions, the change in free energy ( $\Delta G$ ) was calculated for each step in the thermodynamic cycle by integrating the potential energy with respect to the coupling parameter,  $\lambda$  (Shirts, Mobley, et al. 2010). Two corrections were made to these calculated  $\Delta G$  values. The first correction was necessary due to the introduction of the distance restraints (as described in Boresch et al.) which quantified the free energy cost of restraining the ion to the binding site (Boresch, Tettinger et al. 2003). The second correction was performed to correct the charged system (as described in Rocklin et al.) to revise the free energy for the fact that the system is charged during the disappearance of the charged ions (Rocklin, Mobley et al. 2013). The overall  $\Delta G$  of binding was the change in free energy between the ions in complex with the protein (ion in protein steps 1, 2,

and 3) and the ions in water (ion in water steps 1 and 2). For each system, 5 independent runs were performed, and results were averaged.

## Results

### N-terminal cTnC

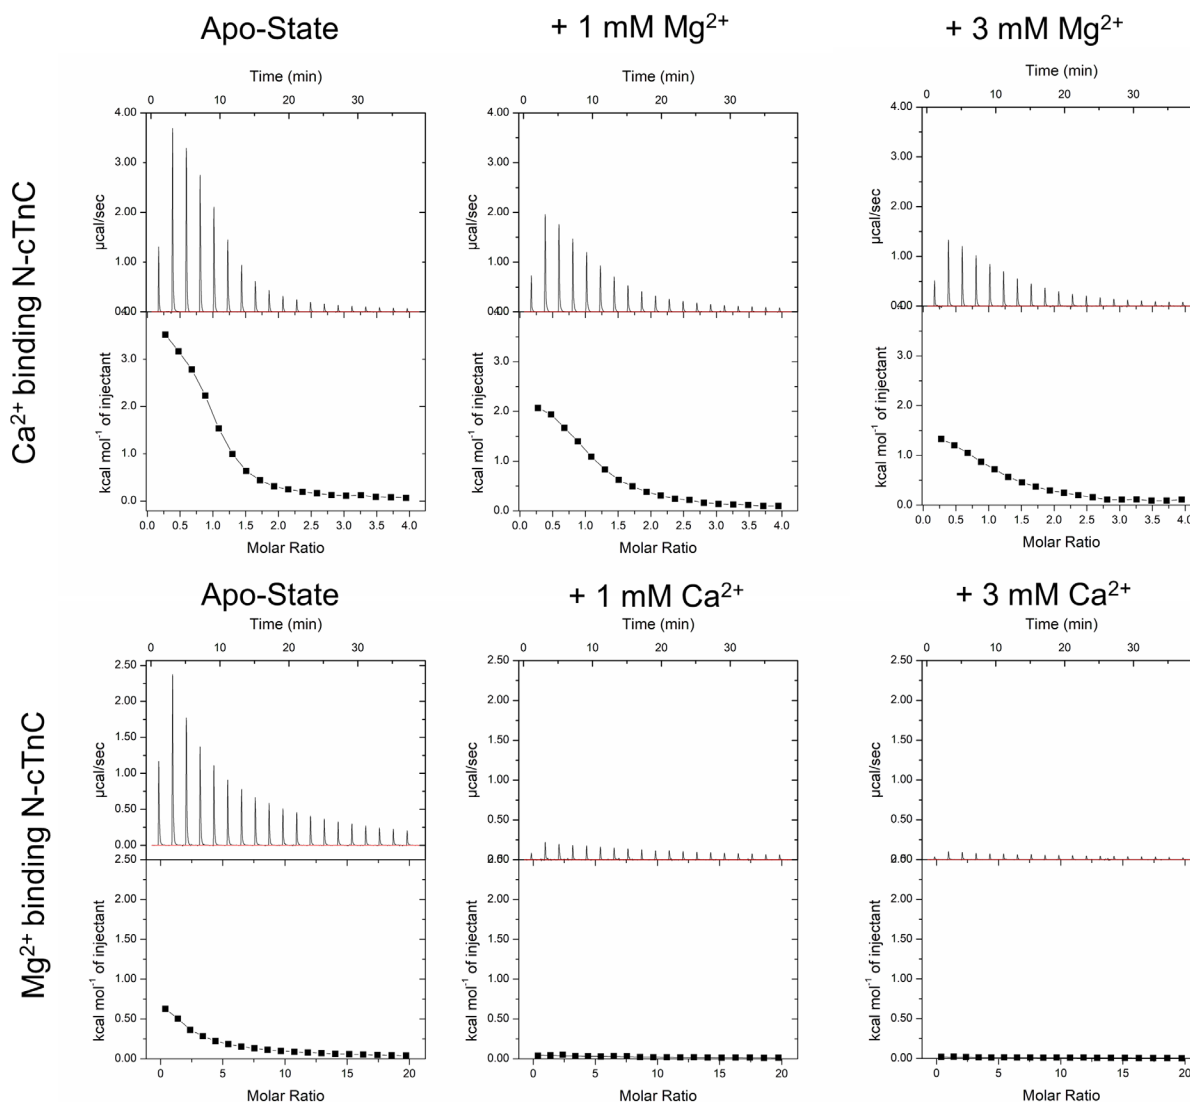

**Figure 1 - Representative isotherms of  $\text{Ca}^{2+}$  and  $\text{Mg}^{2+}$  binding to to apo-state and pre-incubated N-cTnC**

Upper panels show the heat recorded during the titration and lower panels plot the integrated heat signal against the molar ratio of titrant added. The top row shows the titration of 4 mM  $\text{Ca}^{2+}$  into apo-state N-cTnC, followed by the same titration into 1 mM and 3 mM  $\text{Mg}^{2+}$  pre-incubated N-cTnC. The bottom row shows the titration of 20  $\text{Mg}^{2+}$  into apo-state N-cTnC, followed by 1 and 3 mM  $\text{Ca}^{2+}$  pre-incubated N-cTnC. The fitting of integrated heats was achieved using a single binding site model.

#### ***$\text{Ca}^{2+}$ and $\text{Mg}^{2+}$ binding to apo-state N-cTnC***

The interaction of N-cTnC with either  $\text{Ca}^{2+}$  or  $\text{Mg}^{2+}$  was found to be associated with a positive  $\Delta H$ , so the interaction is driven by entropy (**Figure 1**) consistent with previously published data (Skowronsky, Schroeter et al. 2013, Tanaka, Takahashi et al. 2013, Stevens, Rayani et al. 2016,

Stevens, Rayani et al. 2017). This supports our interpretation that the endothermic component between full-length cTnC and  $\text{Ca}^{2+}$  is due to binding to the N-doman.

The affinity of N-cTnC for  $\text{Ca}^{2+}$  ( $K_d = 15.2 \pm 0.5 \mu\text{M}$ ) was found to be more than 42.9-fold greater than for  $\text{Mg}^{2+}$  ( $K_d = 652.8 \pm 28.4 \mu\text{M}$ ) difference (**Figures 1 and 2; Table S2**).

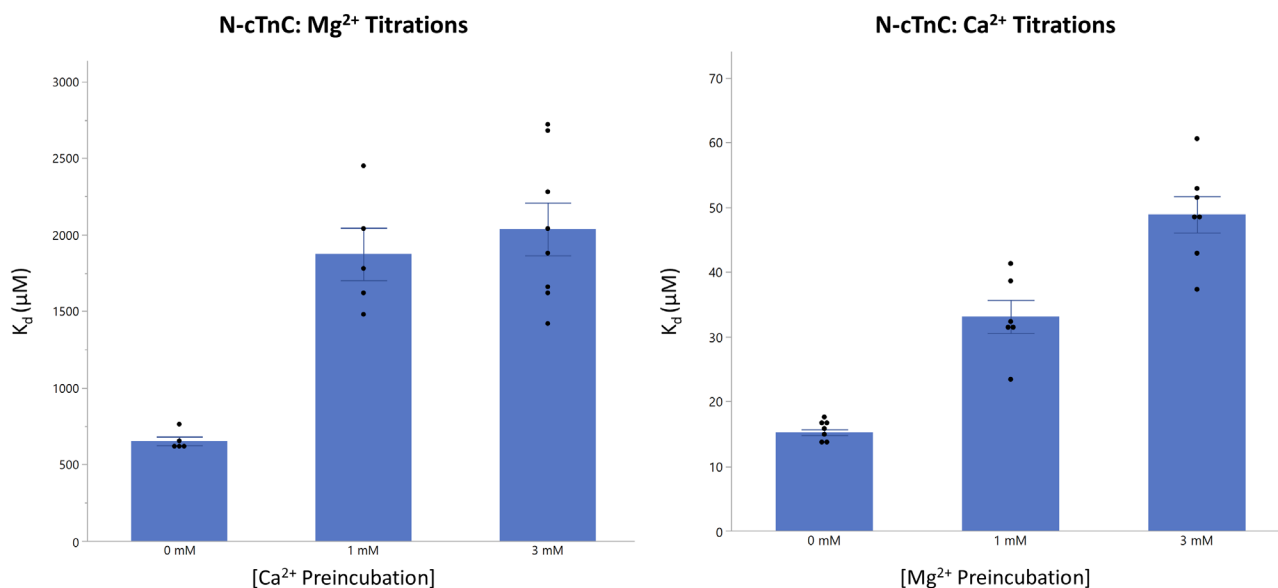

**Figure 2 - Binding of  $\text{Ca}^{2+}$  and  $\text{Mg}^{2+}$  to apo-state and pre-incubated N-cTnC**

Left panel: The affinity of site II for  $\text{Mg}^{2+}$  is compared in the apo-state and with  $\text{Ca}^{2+}$  preincubation in N-cTnC; Right Panel: The affinity of site II for  $\text{Ca}^{2+}$  is compared in the apo-state and with  $\text{Mg}^{2+}$  preincubation in N-cTnC. Statistical differences were assessed through ANOVA followed by Tukey's post hoc test.  $\text{Ca}^{2+}$  titrations were not significantly different but the titration of  $\text{Mg}^{2+}$  into N-cTnC pre-incubated with 1 mM/3 mM  $\text{Ca}^{2+}$  was significantly different from the apo-state titration.

The  $\Delta H$  of the  $\text{Ca}^{2+}$ -N-cTnC interaction was significantly greater ( $3.82 \pm 0.04 \text{ kcal}\cdot\text{mol}^{-1}$ ) than that with  $\text{Mg}^{2+}$  ( $2.64 \pm 0.10 \text{ kcal}\cdot\text{mol}^{-1}$ ). Moreover, the entropic contribution for the  $\text{Ca}^{2+}$  titrations ( $T\Delta S = 10.39 \pm 0.03 \text{ kcal}\cdot\text{mol}^{-1}$ ) was more favorable than the  $\text{Mg}^{2+}$  titrations ( $T\Delta S = 6.99 \pm 0.07 \text{ kcal}\cdot\text{mol}^{-1}$ ) (**Table S2**).

As expected, the affinity of  $\text{Ca}^{2+}$  binding to apo-state N-cTnC was also found to be characterized by the lowest observed dissociation constant ( $K_d$ ) ( $15.2 \pm 0.5 \mu\text{M}$ ) of all the titration conditions carried out, including pre-incubation (**Figure 2 and Table S2**).

### ***$\text{Mg}^{2+}$ binding to $\text{Ca}^{2+}$ pre-incubated N-cTnC***

To investigate  $\text{Mg}^{2+}$  binding, apo-state N-cTnC was pre-incubated with increasing concentrations of  $\text{Ca}^{2+}$  (0, 1, and 3 mM), then titrated with 20 mM  $\text{Mg}^{2+}$  (**Figure 1 and 2; Table S2**).  $\text{Mg}^{2+}$  binding the apo-state N-cTnC occurred with significantly lower affinity ( $652.8 \pm 28.4 \mu\text{M}$ ) than the  $\text{Ca}^{2+}$  titration ( $15.2 \pm 0.5 \mu\text{M}$ ). Moreover, the change in enthalpy in these conditions was significantly

lower as increasing amounts of  $\text{Ca}^{2+}$  was pre-incubated. Titration of  $\text{Mg}^{2+}$  into apo-state protein yielded a  $\Delta H = 2.64 \pm 0.10 \text{ kcal}\cdot\text{mol}^{-1}$ , an order of magnitude lower than  $\text{Ca}^{2+}$  into apo-protein which liberated  $3.82 \pm 0.04 \text{ kcal}\cdot\text{mol}^{-1}$ . Moreover, the  $K_d$  values were  $1870.0 \pm 171.5 \mu\text{M}$  and  $2037.5 \mu\text{M} \pm 172.2 \mu\text{M}$  for the 1 mM and 3 mM  $\text{Ca}^{2+}$  conditions, showing a decrease in affinity with increasing concentrations of  $\text{Ca}^{2+}$  pre-incubated with the protein sample and a more than 2 orders of magnitude lower affinity compare to the  $\text{Ca}^{2+}$  into WT condition. The significant reduction in affinity,  $\Delta H$ , and increasingly smaller  $\Delta S$  associated with higher  $\text{Ca}^{2+}$  pre-incubation suggests that both metal cations may be binding to the same EF-hand binding motif in site II of N-cTnC.

### ***Ca<sup>2+</sup> binding to Mg<sup>2+</sup> pre-incubated N-cTnC***

Apo-protein pre-incubated with  $\text{Mg}^{2+}$  was titrated with  $\text{Ca}^{2+}$  to assess the “apparent” affinity of the protein for  $\text{Ca}^{2+}$  when the site might be occupied with the other divalent cations. As expected, increasing the  $\text{Mg}^{2+}$  concentration reduced the amount  $\Delta H$  associated with binding from  $3.82 \pm 0.04 \text{ kcal}\cdot\text{mol}^{-1}$  in the apo titration to  $1.73 \pm 0.05 \text{ kcal}\cdot\text{mol}^{-1}$  in the 3 mM  $\text{Mg}^{2+}$  pre-incubated construct. The binding affinity similarly changed from  $15.2 \pm 0.5 \mu\text{M}$  to  $48.9 \pm 2.8 \mu\text{M}$ . The  $\text{Ca}^{2+}$  affinity was lower compared to the apo-N-cTnC binding condition and decreased with higher concentrations of  $\text{Mg}^{2+}$  (**Figure 2 and Table S2**).

## Ca<sup>2+</sup> and Mg<sup>2+</sup> binding to apo-D67A/D73A N-cTnC

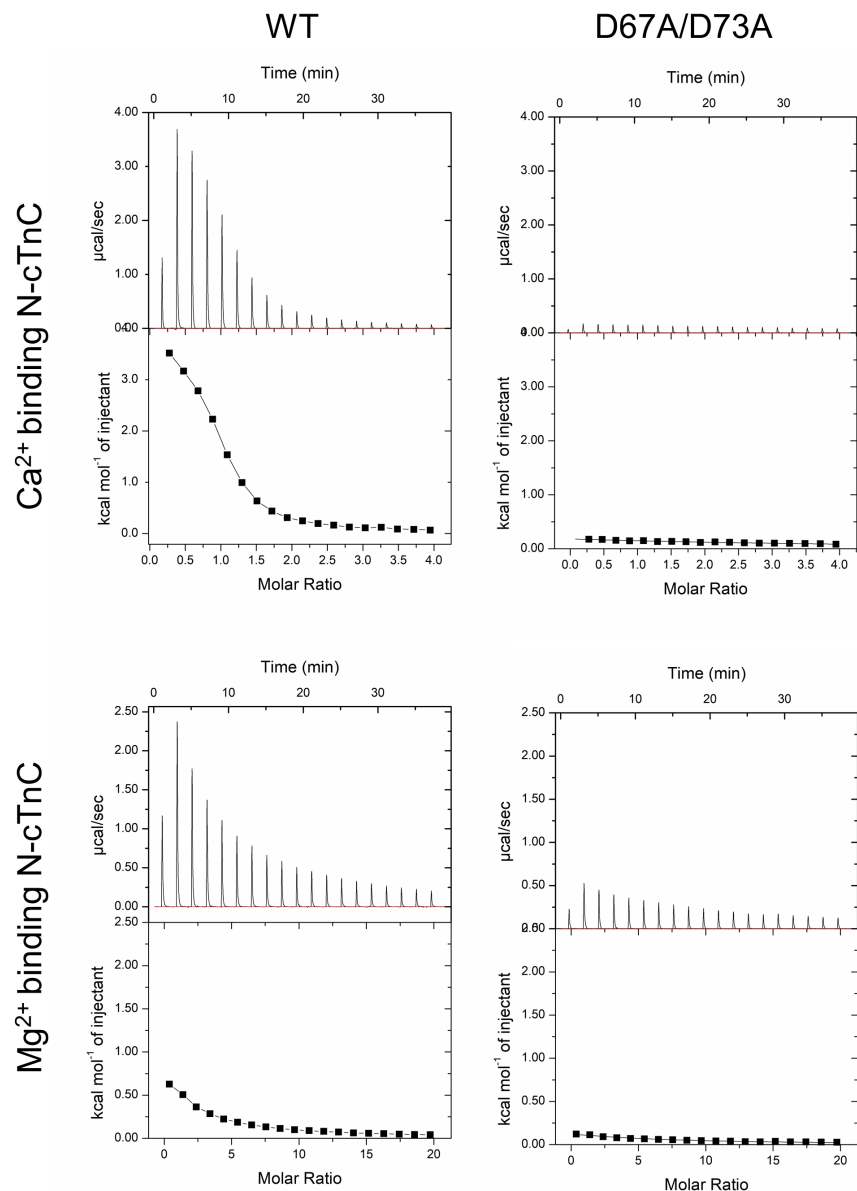

**Figure 3 - Representative binding isotherms for binding of Ca<sup>2+</sup> and Mg<sup>2+</sup> WT and D67A/D73A N-cTnC**

The top row shows the titration of 4 mM Ca<sup>2+</sup> into apo-state N-cTnC, followed by the same titration into the D67A/D73A mutant. The bottom row shows the titration of 20 mM Mg<sup>2+</sup> into apo-state N-cTnC, followed by the same titration into the D67A/D73A mutant. The fitting of integrated heats was achieved using a single binding site model.

Point mutations (D67A and D73A) were made (**Figure S2**), affecting two known Ca<sup>2+</sup> coordinating residues in site II. Binding of both divalent cations was reduced by these mutations but the K<sub>d</sub> was still lower for Ca<sup>2+</sup> binding (180.3 ± 16.2 µM) compared to Mg<sup>2+</sup> binding (1148.6 ± 95.0 µM) (**Figures 3 and 4; Table S2**). Compared to the WT, Ca<sup>2+</sup> binding was reduced 11.9-fold and Mg<sup>2+</sup> binding was reduced 1.8-fold by the double mutation. The change in affinity was significantly higher for the Ca<sup>2+</sup> titrations but statistically indifferent for Mg<sup>2+</sup>.

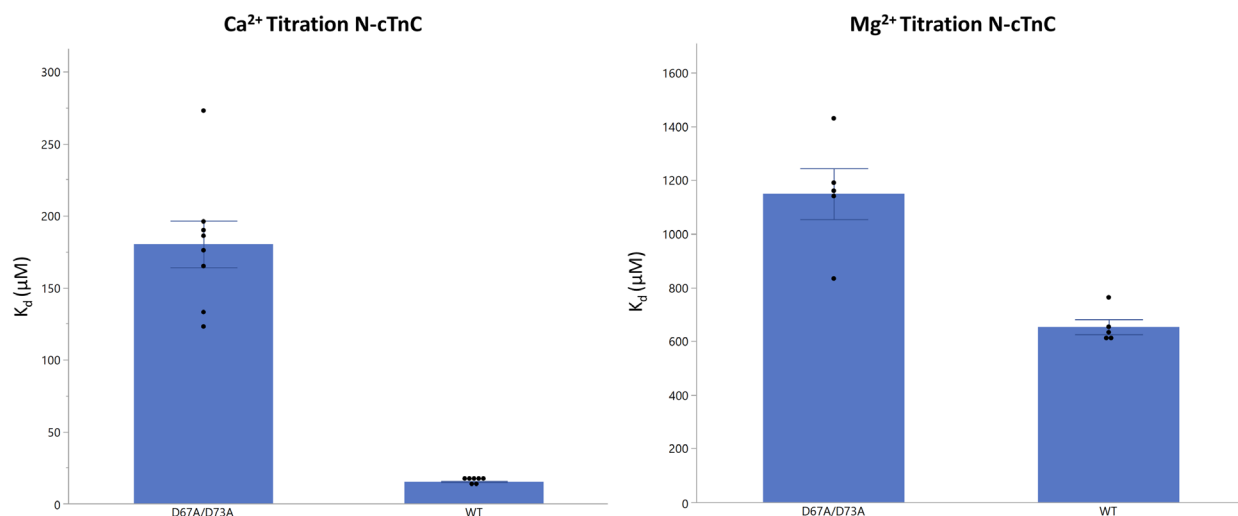

#### Figure 4 - Binding of $\text{Ca}^{2+}$ and $\text{Mg}^{2+}$ to WT and D67A/D73A N-cTnC

The effect of the D67A/D73A on  $\text{Ca}^{2+}$  and  $\text{Mg}^{2+}$  binding is assessed. The affinity of binding for both cations to N-cTnC was lower when comparing the mutant and the WT. The effect on  $\text{Ca}^{2+}$  binding was more pronounced (11.9-fold reduction) compared to  $\text{Mg}^{2+}$  (1.8-fold reduction) but this is reconcilable with the number of coordinating residues needed to bind  $\text{Ca}^{2+}$  (6) vs.  $\text{Mg}^{2+}$  (5); having 4 available coordinating residues was expected to affect  $\text{Ca}^{2+}$  binding to a greater extent.

#### ***$\text{Ca}^{2+}$ and $\text{Mg}^{2+}$ binding affinities from Thermodynamic Integration***

Thermodynamic Integration (TI) was performed to calculate absolute binding affinities for the ions in the following systems:  $\text{Ca}^{2+}$  to WT N-cTnC,  $\text{Ca}^{2+}$  to D67A/D73A N-cTnC,  $\text{Mg}^{2+}$  to WT N-cTnC, and  $\text{Mg}^{2+}$  to D67A/D73A N-cTnC. The average calculated binding affinities over 5 independent runs were  $-6.9 \pm 1.3$ ,  $-4.5 \pm 2.4$ ,  $-0.6 \pm 2.8$ , and  $+0.4 \pm 2.3$  kcal\* $\text{mol}^{-1}$ , respectively. The TI-determined  $\text{Ca}^{2+}$  binding affinities were in good agreement with the ITC data. While the calculated absolute  $\text{Mg}^{2+}$  binding affinities were not in perfect agreement with the ITC data, they did show that  $\text{Mg}^{2+}$  had a weaker binding affinity than  $\text{Ca}^{2+}$  for all systems ( $-6.57$  to  $-4.38$  kcal\* $\text{mol}^{-1}$  and  $-6.9$  to  $-0.6$  kcal\* $\text{mol}^{-1}$  for ITC and TI, respectively for WT system and  $-5.12$  to  $-4.02$  kcal\* $\text{mol}^{-1}$  and  $-4.5$  to  $+0.4$  kcal\* $\text{mol}^{-1}$  for ITC and TI, respectively for D67A/D73A system). Additionally, between the  $\text{Mg}^{2+}$  binding affinities, the binding affinity was consistently weaker for the D67A/D73A mutation. The  $\Delta\Delta G$  values comparing  $\Delta G$  between WT and D67A/D73A systems were similar for ITC and TI ( $0.36$  kcal\* $\text{mol}^{-1}$  and  $1.0$  kcal\* $\text{mol}^{-1}$ , respectively).

**Table 1 - Average calculated binding affinities for each Thermodynamic Integration system**

| System                        | $\Delta G_{TI}$ (kcal* $\text{mol}^{-1}$ ) |
|-------------------------------|--------------------------------------------|
| Ca <sup>2+</sup> to WT        | -6.9 ± 1.3                                 |
| Ca <sup>2+</sup> to D67A/D73A | -4.5 ± 2.4                                 |
| Mg <sup>2+</sup> to WT        | -0.6 ± 2.8                                 |
| Mg <sup>2+</sup> to D67A/D73A | +0.4 ± 2.0                                 |

Averages were calculated over 5 independent runs

## Full length cTnC

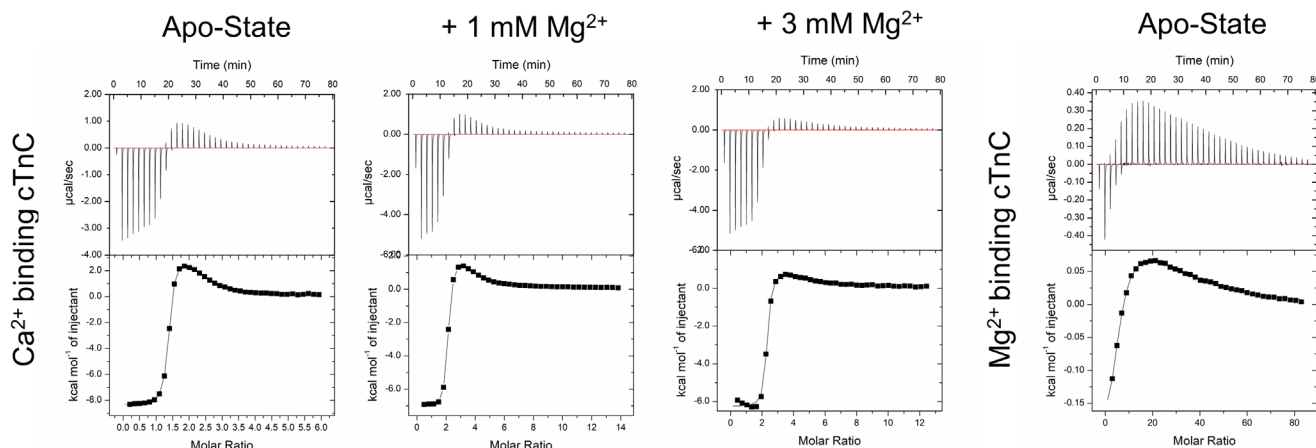

**Figure 5 - Representative isotherms for binding of Ca<sup>2+</sup> and Mg<sup>2+</sup> to full length cTnC**

Representative isotherms for each full-length cTnC titration condition are shown. Upper panels show the heat recorded during the titration and lower panels plot the integrated heat signal against the molar ratio of titrant added. A two sets of binding sites model was used to fit the integrated heats. From left to right, the panels show: the titration of 6 mM Ca<sup>2+</sup> into: apo-state full length cTnC, 1 mM Mg<sup>2+</sup> incubated cTnC, and 3 mM Mg<sup>2+</sup> incubated cTnC. The isotherms can be used to visually determine the decreased amount of binding to site II in the presence of increasing Mg<sup>2+</sup>. In the right most panel of this figure, the binding of Mg<sup>2+</sup> to apo-state full-length cTnC occurs at two sets of different sites as seen in the isotherm which contains both exothermic and endothermic components.

### Ca<sup>2+</sup> binding to apo-state full length cTnC

Binding of Ca<sup>2+</sup>/Mg<sup>2+</sup> to site II is characterized by an endothermic interaction as indicated by our titrations on the N-terminal domain in this and previous publications (Stevens, Rayani et al. 2016, Stevens, Rayani et al. 2017). From this, and ITC work on full-length cTnC by others (Johnson, Fulcher et al. 2019), we can deduce that the exothermic interactions seen above (**Figure 5**) result from interactions with site III/IV. The data (**Figure 5 and Table S3**) show that Mg<sup>2+</sup> binds to apo-state full-length cTnC at two distinct sets of sites.



The binding of  $\text{Ca}^{2+}$  to sites III/IV occurred with an apparent  $K_d$  of  $0.12 \pm 0.02 \mu\text{M}$ , characterized by an exothermic component ( $\Delta H = -8.12 \pm 0.07 \text{ kcal}\cdot\text{mol}^{-1}$ ) with a positive change in entropy ( $T^*\Delta S = 1.24 \pm 0.07 \text{ kcal}\cdot\text{mol}^{-1}$ ). In the same full-length construct, the  $K_d$  associated with binding of  $\text{Ca}^{2+}$  to site II was  $22.7 \pm 0.5 \mu\text{M}$  significantly lower binding affinity. It also had positive  $\Delta H$  ( $3.71 \pm 0.06 \text{ kcal}\cdot\text{mol}^{-1}$ ) and was entropically driven ( $T^*\Delta S = 10.0 \pm 0.07 \text{ kcal}\cdot\text{mol}^{-1}$ ) (**Figure 5 and 6; Table S3**).

### ***Mg<sup>2+</sup> binding to apo-state full length cTnC***

$\text{Mg}^{2+}$  binding to site II ( $K_d = 406.1 \pm 7.9 \mu\text{M}$ ) and sites III/IV ( $K_d = 16.7 \pm 0.7 \mu\text{M}$ ) was characterized by a positive  $\Delta H$  ( $0.091 \pm 0.001 \text{ kcal}\cdot\text{mol}^{-1}$ ) and negative  $\Delta H$  ( $-0.23 \pm 0.01 \text{ kcal}\cdot\text{mol}^{-1}$ ), respectively (**Figure 5 and Table S3**). Based on these enthalpy values, significantly greater amounts of  $\text{Mg}^{2+}$  binding occur at the C-terminus in comparison to the N-terminus.

The interaction of  $\text{Mg}^{2+}$  with sites III/IV is two orders of magnitude weaker than that seen for  $\text{Ca}^{2+}$ . The interaction with site II and sites III/IV were both entropically favorable ( $T^*\Delta S = 4.71 \pm 0.01 \text{ kcal}\cdot\text{mol}^{-1}$  and  $T^*\Delta S = 6.28 \pm 0.03 \text{ kcal}\cdot\text{mol}^{-1}$ ) and resulted in spontaneous interactions ( $\Delta G = -4.62 \pm 0.11 \text{ kcal}\cdot\text{mol}^{-1}$  and  $\Delta G = -6.51 \pm 0.31 \text{ kcal}\cdot\text{mol}^{-1}$ ). These all differed significantly from those observed for  $\text{Ca}^{2+}$  binding,  $p < 0.05$ .

### ***Ca<sup>2+</sup> binding to Mg<sup>2+</sup> pre-incubated full length cTnC***

At greater concentrations,  $\text{Mg}^{2+}$  occupied a greater proportion of binding sites and limited binding  $\text{Ca}^{2+}$  to cTnC at all sites (**Figure 5 and 6; Table S3**). Binding of  $\text{Ca}^{2+}$  to site II was significantly reduced by pre-incubation with 1 mM and 3 mM  $\text{Mg}^{2+}$  as indicated by an increase in  $K_d$  and a lowering of the  $\Delta H$ . Binding of  $\text{Ca}^{2+}$  to sites III/IV in the presence of 1 mM  $\text{Mg}^{2+}$  resulted in a  $K_d$  ( $0.14 \pm 0.01 \mu\text{M}$ ) that was not significantly different ( $p < 0.05$ ) than seen for the 3 mM  $\text{Mg}^{2+}$  preincubation ( $K_d = 0.08 \pm 0.01 \mu\text{M}$ ) (**Figure 5 and Table S3**).

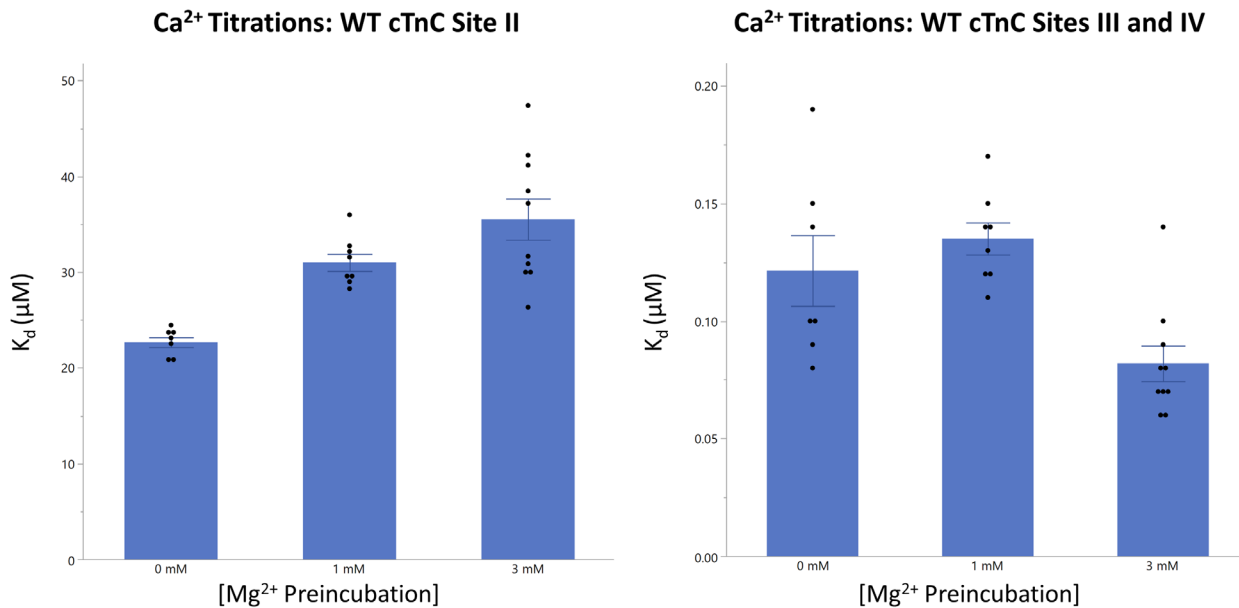

### Figure 6 - Binding of Ca<sup>2+</sup> and Mg<sup>2+</sup> to apo-state and pre-incubated full length cTnC

Left panel: The affinity of site II for Ca<sup>2+</sup> is compared in the apo-state and with Mg<sup>2+</sup> preincubation in full length cTnC; Right Panel: The affinity of sites III/IV for Ca<sup>2+</sup> is compared in the apo-state and with Mg<sup>2+</sup> preincubation in full length cTnC. At site II, preincubation with 1 and 3 mM Mg<sup>2+</sup> caused a significant reduction in the affinity for Ca<sup>2+</sup> binding. At sites III/IV, preincubation with 1 mM Mg<sup>2+</sup> decreased affinity for Ca<sup>2+</sup> binding (not statistically significant), while 3 mM Mg<sup>2+</sup> unexpectedly increased the affinity for Ca<sup>2+</sup> binding at these sites. Statistical differences were assessed through two-way ANOVA followed by Tukey's post hoc test.

At sites III/IV, for the 1 mM Mg<sup>2+</sup> pre-incubation, the interaction proceeded with favorable enthalpy ( $\Delta H = -6.87 \pm 0.09 \text{ kcal} \cdot \text{mol}^{-1}$ ) and entropy ( $T \cdot \Delta S = 2.50 \pm 0.10 \text{ kcal} \cdot \text{mol}^{-1}$ ). For the 3 mM Mg<sup>2+</sup> condition, the reaction was again exothermic ( $\Delta H = -6.19 \pm 0.06 \text{ kcal} \cdot \text{mol}^{-1}$ ) with a positive change in  $T \cdot \Delta S$  ( $3.50 \pm 0.06 \text{ kcal} \cdot \text{mol}^{-1}$ ).

## Discussion

This study provides novel information regarding the thermodynamics that underlie the interaction between cTnC and two physiologically prevalent divalent cations. Our results significantly advance the understanding of the mechanisms and role of modifications in cellular  $Mg^{2+}$  in control of the cTnC  $Ca^{2+}$  switch. Cellular free  $Mg^{2+}$  is known to change in pathological conditions in the heart, but mechanisms of its effects on activation of the myofilaments remains incompletely understood.

As seen in previous reports, we found the binding of  $Ca^{2+}$  to N-cTnC to be driven by entropy and unfavorable enthalpy (**Table S2**) (Stevens, Rayani et al. 2017, Johnson, Fulcher et al. 2019). The favorable  $\Delta S$  may be due in part to the hydration enthalpy of  $Ca^{2+}$  which is thought to be on the order of  $\sim 375 \text{ kcal}\cdot\text{mol}^{-1}$  and slightly lower than that of  $Mg^{2+}$  ( $\sim 460 \text{ kcal}\cdot\text{mol}^{-1}$ ) (Smith DW, 1977). It is also possible that the endothermic nature of these interactions results from other factors such as the exchange of protons that are transferred from the ligand to the buffer upon  $Ca^{2+}$  binding (Skowronsky, Schroeter et al. 2013).

Measurement of  $Ca^{2+}$  binding to cTnC is often achieved indirectly by measuring the fluorescence change and correlating this to the conformational change that results from the interaction. Fluorescent molecules such as IAANS (Wang, Huang et al. 1997, Hazard, Kohout et al. 1998, Li, Stevens et al. 2013) or reporters such as F27W (Gillis, Blumenschein et al. 2003) can be used to quantify this binding interaction. At  $21^\circ\text{C}$  bovine F27W cTnC had a  $K_d$  of  $\sim 5 \mu\text{M}$  and IAANS labelled C35S cTnC had a  $K_d$  of  $\sim 7 \mu\text{M}$  (Gillis, Marshall et al. 2000, Tikunova and Davis 2004). Through fluorescence-based measurement, the  $K_d$  of N-cTnC for  $Ca^{2+}$  was previously reported to be between  $11.3 \mu\text{M}$  -  $12.3 \mu\text{M}$  (Liang, Chung et al. 2008, Pinto, Parvatiyar et al. 2009). These parameters agree with our measured  $Ca^{2+}$  binding to apo-state N-cTnC and apo-state cTnC (**Table S2**), deviating only slightly due to buffer and temperature conditions.

Normally, cytosolic  $[Mg^{2+}]_{\text{free}}$  is maintained around  $\sim 0.5 - 1 \text{ mM}$  (Romani 2011). At these concentrations,  $Mg^{2+}$  is known to compete with  $Ca^{2+}$  for sites III and IV. Circular dichroism has been used to show that  $Ca^{2+}$  binding to sites III/IV increases the  $\alpha$ -helical content of cTnC, from 19 to 41 percent (Herzberg and James 1985, Yumoto, Nara et al. 2001) and causes conformational changes that remove non-polar amino acids from the solvent exposed environment (Sturtevant 1977). This contrasts with NMR-based visualization of N-cTnC, in which the apo-state and  $Ca^{2+}$ -bound forms showed minimal structural deviation (Spyracopoulos, Li et al. 1997).

$Ca^{2+}$  has many times greater polarizability than  $Mg^{2+}$  and lower hydration energy (Carafoli and Krebs 2016). The bare ion radius of  $Mg^{2+}$  ( $0.65 \text{ \AA}$ ) is smaller than  $Ca^{2+}$  ( $0.99 \text{ \AA}$ ) (Lockless, Zhou et al.

2007), conversely, in its hydrated form  $Mg^{2+}$  (4.3 Å) is larger than  $Ca^{2+}$  (4.1 Å) (Maguire 2006). In other  $Ca^{2+}$  binding proteins such as calmodulin (CaM), metals with similar ionic radii are able to substitute for this cation (Chao, Suzuki et al. 1984, Malmendal, Linse et al. 1999).  $Mg^{2+}$  is able to bind to CaM, but does not induce the conformational change associated with  $Ca^{2+}$  binding; a phenomenon that is commonly observed in cell biology (Follenius and Gerard 1984, Gilli, Lafitte et al. 1998).

Normally, six oxygen atoms arranged in an octahedral geometry are thought to coordinate  $Mg^{2+}$  (Linse and Forsen 1995). This is one less oxygen than needed to coordinate  $Ca^{2+}$  through a pentagonal bipyramid (Cates, Berry et al. 1999). However,  $Ca^{2+}$  can be coordinated by 6 – 8 coordinating residues (but also by as many as 12) at a distance that can vary greatly (2.3 – 2.7 Å) compared to a much smaller variance for  $Mg^{2+}$  coordination (2.0 – 2.2 Å) (Brini, Cali et al. 2012).

$Ca^{2+}$  and  $Mg^{2+}$  are most often coordinated by oxygen atoms, this is usually a hydroxyl group for  $Mg^{2+}$  and a carboxyl group for  $Ca^{2+}$  (Harding 2002).  $Ca^{2+}$  is most frequently coordinated by side chains of aspartic acid, glutamic acid, asparagine, followed by serine/threonine, while  $Mg^{2+}$  is most frequently coordinated by aspartic acid, glutamic acid, histidine, threonine, serine, and asparagine. (Dokmanic, Sikic et al. 2008). EF hand-containing proteins have also been shown to bind  $Mg^{2+}$  when there are appropriately placed negatively charged amino residues (especially in the +z and -z positions) (Reid and Procyshyn 1995, Tikunova, Black et al. 2001, Davis, Rall et al. 2002). In site II of mammalian cTnC, there is a polar serine at the +z position (residue 69) and a negatively charged glutamic acid at the –z position (residue 76) (**Figure S1**).

Data from earlier studies suggested  $Mg^{2+}$  bound exclusively at sites III and IV of TnC (Potter and Gergely 1975). Shortly thereafter, a limited series of equilibrium dialysis experiments did not show competition between  $Mg^{2+}$  and  $Ca^{2+}$  for the N-terminal sites of cTnC, instead, other binding sites were suggested (Holroyde, Robertson et al. 1980). Later still, enthalpic titrations were unable to visualize a discernable change in  $Mg^{2+}$  binding to the low affinity sites of skeletal TnC (Yamada and Kometani 1982, Li, Chandra et al. 1994). However, assuming competitive binding fluorescence assays at room temperature determined the  $K_d$  associated with  $Mg^{2+}$  binding to be about 4 mM (Johnson, Collins et al. 1980). More recently,  $Ca^{2+}$  sensitivity of the actomyosin ATPase and force production of skinned rat cardiac cells was unaltered when  $Mg^{2+}$  was increased from 1 to 8 mM (Allen, Xu et al. 2000). These findings were brought into question, however, by studies that utilized metallochromic indicators to deduce sufficiently high  $Mg^{2+}$ -affinity at the regulatory sites of skeletal TnC (Ogawa 1985).

The observation of  $Mg^{2+}$  binding to the low affinity sites of N-cTnC has led to the suggestion that differences in affinity may be due at least in part to the  $Ca^{2+}$  buffering and thus the free

concentration of the ion in these experiments. Given the kinetic rates associated with these interactions, it is difficult to have confidence in EGTA determined rates of binding (Ebashi and Ogawa 1988). Moreover, given the temperature sensitivity of cTnC, this factor alone can alter experimental outcomes by orders of magnitude (Kohama 1980, Gillis, Moyes et al. 2003). Change in sensitivity in the face of altered temperature has been suggested to result mostly from binding to the low affinity sites and possibly through interactions with other members of the Tn complex (Godt and Lindley 1982, Stephenson and Williams 1982, Wnuk, Schoechlin et al. 1984).

Experiments testing the effects of alterations in free  $Mg^{2+}$  on  $Ca^{2+}$ -activation of isolated myofibrils and skinned fiber bundles from different laboratories provide corroborative findings supporting the credibility of our postulate of a role for cytosolic  $Mg^{2+}$  as a controller of cTnC function at the N-lobe. Fabiato and Fabiato showed that increasing concentration of free  $Mg^{2+}$  decreases myofilament  $Ca^{2+}$  sensitivity of skinned cardiomyocytes (Fabiato and Fabiato 1975).  $[Mg^{2+}]$  affects the  $Ca^{2+}$ -sensitivity of the myofibrillar ATPase as well as actomyosin tension development in both skeletal and cardiac muscle preparations (Donaldson and Kerrick 1975, Kerrick and Donaldson 1975, Solaro and Shiner 1976, Ashley and Moisesescu 1977, Best, Donaldson et al. 1977, Donaldson, Best et al. 1978, Ebashi, Nonomura et al. 1980, Morimoto 1991).

$Mg^{2+}$  affinity of sites III/IV alone is not sufficient to fully explain the change in the force-pCa relationship caused by  $Mg^{2+}$  in skinned skeletal muscle fibers (Ebashi and Endo 1968). In rabbit fast skeletal muscle,  $Mg^{2+}$  competes with  $Ca^{2+}$  for low affinity binding sites of TnC where it binds with an affinity of  $1.9 \cdot 10^2 M^{-1}$  (much lower than the  $6.2 \cdot 10^6 M^{-1}$  seen for  $Ca^{2+}$ ). The  $K_A$  associated with sites III and IV was measured to be  $1.2 \cdot 10^6 M^{-1}$  for  $Ca^{2+}$  and  $1.1 \cdot 10^2 M^{-1}$  for  $Mg^{2+}$  in canine ventricular skinned myocytes (Pan and Solaro 1987).

In isolated cTnC,  $Mg^{2+}$  was found to interact with site II of cTnC with an apparent binding constant of  $5.2 \cdot 10^2 M^{-1}$ . This was only slightly lower than the constant associated with  $Mg^{2+}$  binding to sites III/IV ( $\sim 10^3 M^{-1}$ ),  $Ca^{2+}$  binding to sites III/IV ( $\sim 10^6 M^{-1}$ ), and  $Ca^{2+}$  binding to site II ( $\sim 10^4 M^{-1}$ ) (Ogawa 1985).

Fluorescence was used to measure the  $Mg^{2+}$  affinity of site II at 15 °C ( $\sim 1.2$ - $1.9$  mM) (Tikunova and Davis 2004). In the presence of 3 mM  $Mg^{2+}$ , the  $K_d$  associated with binding of  $Ca^{2+}$  to site II of full length cTnC was increased from 7  $\mu M$  in the apo-state to 24  $\mu M$  (Tikunova and Davis 2004). Moreover, a system containing cTnC-cTnI had 2.5-fold lower  $Ca^{2+}$  affinity in the presence of 3 mM  $Mg^{2+}$  (Siddiqui, Tikunova et al. 2016). Given these affinities, Tikunova and Davis hypothesized that site II would be 33-44% saturated by 1 mM cytosolic  $Mg^{2+}$  at diastolic  $Ca^{2+}$  concentrations (Tikunova and Davis 2004).

In a recent ITC study, the  $Mg^{2+}$  binding affinity of site II in lobster TnC isoforms, which are similar in sequence to human variants, was explored.  $Mg^{2+}$  affinity of site II was a single order of magnitude lower than that of  $Ca^{2+}$ , such that the cations would compete for binding (Tanaka, Takahashi et al. 2013) under physiological conditions.

In our experiments on N-cTnC and full length cTnC, site II binding affinity of  $Mg^{2+}$  was an order of magnitude lower than seen for  $Ca^{2+}$  (**Figures 2 and 6; Table S2 and S3**). At these affinities and given the relatively high cytosolic  $[Mg^{2+}]_{free}$  (Linse and Forsen 1995, Malmendal, Linse et al. 1999), this cation would compete for binding to site II of cTnC (Nara, Morii et al. 2013). Competition experiments were also in agreement (**Figures 1 and 2**) as were studies that utilized a double mutant removing coordinating residues in site II (**Figures 3 and 4**).

In order to further validate the ITC data, we also performed thermodynamic integration (TI) to calculate absolute binding affinities computationally. We performed these calculations for both  $Ca^{2+}$  and  $Mg^{2+}$  binding separately for both WT N-cTnC and D67A/D73A N-cTnC. For both sets of simulations, the structure of  $Ca^{2+}$ -bound N-cTnC (PDB:1AP4) was used as the starting parameter and restrained throughout the simulation. ITC measures the thermodynamically quantifiable closed-to-open transition of the N-cTnC molecule. TI does not allow for such a transition, rather, it quantifies only the binding interaction. In the future, the closed structure of N-cTnC (PDB:1SPY) can be simulated to quantify the presumably lower affinity it has for each of  $Ca^{2+}$  and  $Mg^{2+}$ . The difference between these sets of simulations could then be used to better corroborate the ITC data.

For  $Ca^{2+}$  binding, our TI results agreed very well with the binding affinities from ITC. For  $Mg^{2+}$  binding, the calculated absolute binding affinities were consistently underestimated by about 4  $kcal \cdot mol^{-1}$  but showed the same relative trends.  $Mg^{2+}$  was calculated to bind weaker than  $Ca^{2+}$  and bind weaker for the D67A/D73A mutation similarly to ITC. The  $Mg^{2+}$  absolute binding affinities were likely underestimated for multiple reasons. First, the crystal structure of WT N-cTnC (1AP4) contained  $Ca^{2+}$  bound and no structure of  $Mg^{2+}$  bound WT N-cTnC was available. We attempted to correct for this issue by minimizing the structure with  $Mg^{2+}$  bound. Due to the lack of an exact starting structure and restraints chosen, there is still likely some error. Additionally, while we did try to choose the most accurate  $Mg^{2+}$  parameters for binding affinity calculation, there are well documented difficulties in free energy calculations for  $Mg^{2+}$ , most notably that the free energy of solvation ( $\Delta G_{solvation}$ ) is consistently underestimated (Steinbrecher, Joung et al. 2011, Panteva, Giambasu et al. 2015). Even when using the same  $Mg^{2+}$  force field, solvation  $\Delta G$  values are also known to have large variations for  $Mg^{2+}$  depending on the exact simulation parameters used. For example, Panteva et al. and Li et al. both tried to reproduce  $Mg^{2+}$  solvation free energy using the same parameters as Åqvist, but saw variations on the order of 20  $kcal \cdot mol^{-1}$  (Åqvist 1990). While this may be an extreme example, it illustrates the

difficulty in calculation of free energy changes with  $Mg^{2+}$  ions involved. Given these potential errors in TI for  $\Delta G_{\text{solvation}}$  for  $Mg^{2+}$ , the fact that we still see relatively good agreement with the ITC data for absolute binding affinity of  $Mg^{2+}$  helps further validate the *in vitro* results.

The experiments outlined above were designed with the intent to test the hypothesis that:  $Ca^{2+}$  and  $Mg^{2+}$  both interact with all the functional EF-hand motifs in cTnC. The interaction with sites III and IV has been established for some time (Johnson, Collins et al. 1980), but site II may also bind  $Mg^{2+}$ . Interestingly, a hypothesis that is reconcilable with our own was initially put forth; that of six binding sites. In this scenario there were: two  $Ca^{2+}$  specific sites, two  $Mg^{2+}$  specific sites, and two sites that can bind both cations. During these experiments, only the absence of  $Mg^{2+}$  allowed for the binding sites in cTnC to be separated into low affinity sites ( $\sim 10^5 M^{-1}$ ) and high affinity sites ( $\sim 10^7 M^{-1}$ ) (Potter and Gergely 1975).

Binding of  $Mg^{2+}$  to site II is not expected to induce significant structural changes in N-cTnC based on previous Molecular Dynamics simulation data (Spyracopoulos, Li et al. 1997, Skowronsky, Schroeter et al. 2013, Stevens, Rayani et al. 2017). Therefore, it is likely that the favorable  $\Delta S$  associated with the interaction is due to increased degrees of freedom for the water molecules that would result when stabilizing hydrogen bonds are transferred from the positively charged metal cation and the negatively charged amino acid side chains in the binding site II to the buffered environment (Skowronsky, Schroeter et al. 2013).

Given that the binding of  $Ca^{2+}$  to site II of cTnC at systolic  $Ca^{2+}$  levels (0.5 - 1.2  $\mu M$ ) strengthens the interaction with cTnI and the rest of the cTn complex and the orders of magnitude difference between binding affinity at varying levels of filament complexity, (Potter and Gergely 1975, Ramos 1999, Pinto, Parvatiyar et al. 2009, Li, Stevens et al. 2013), care must be taken when translating observations at the level of cTnC to more complex systems. Moreover, a further limitation is part of our approach which utilizes the double mutant D67A/D73A. This mutation was able to reduce the binding of both  $Ca^{2+}$  (11.9-fold) and  $Mg^{2+}$  (1.8-fold) to site II of N-cTnC; however, the impact on binding might be expected to be greater. It is possible that the effect of this double mutant is to reduce the binding of these cations, especially  $Mg^{2+}$  through allosteric interactions. In CaM, mutation of  $Ca^{2+}$  coordinating residues within the EF-hand can have structural consequences leading to altered binding kinetics (Wang, Brohus et al. 2020); this is conceivable in our double mutant. Similarly, it is possible that the competition observed between  $Ca^{2+}$  and  $Mg^{2+}$  for binding to site II of cTnC occurs through structural perturbations which follow binding of  $Mg^{2+}$  to an allosteric site. Exploration of these limitations in future studies may shed light on the true nature of these interactions.

Our ITC results strongly suggest that  $Mg^{2+}$  binds to site III/IV and also competes with  $Ca^{2+}$  for binding to site II. The amount of  $Mg^{2+}$  that binds the regulatory site II is likely to be highly dependent on technique, biological system, and buffer conditions. In N-cTnC, occupation of site II by  $Mg^{2+}$  was again seen to reduce the amount of  $Ca^{2+}$  which was able to bind this protein, at concentrations that may have physiologically relevant consequences under normal conditions and even more so in the face of diseases which alter the  $Ca^{2+}$  sensitivity of contraction.

Moreover, increases in cAMP in the cell through  $\alpha$ - and  $\beta$ -adrenergic stimulation elicits extrusion of  $Mg^{2+}$  from the cell in mammalian tissues (Wolf, Di Francesco et al. 1996, Fagan and Romani 2001, Cefaratti and Romani 2007) including cardiomyocytes (Vormann and Günther 1987, Howarth, Waring et al. 1994). If shown in the heart, both  $Na^+$ -dependent and independent removal of  $Mg^{2+}$  from the cytosol under stressful conditions would lower cytosolic presence of this cation. Despite this, free  $Mg^{2+}$  does not fluctuate greatly under such stimulation, suggesting that buffered  $Mg^{2+}$  is removed from the cell (Amano, Matsubara et al. 2000). Nevertheless, this altered  $Mg^{2+}$  pool may affect the subset of ions available to compete with  $Ca^{2+}$  for binding to troponin.

Based on our binding experiments and given the previous studies cited herein,  $Mg^{2+}$  may also compete with  $Ca^{2+}$  in binding to the regulatory site II. Free  $Ca^{2+}$  is tightly regulated at rest ( $\sim 0.1 \mu M$ ) despite relatively high total cytosolic concentrations (2.1 – 2.6 mM) (Brini, Cali et al. 2012).  $Mg^{2+}$  is also abundant in the cell but is less tightly controlled. Binding of both  $Ca^{2+}$  and  $Mg^{2+}$  to site II is endothermic, and thus driven by entropy. Relative to  $Ca^{2+}$ ,  $Mg^{2+}$  binds site II with lower affinity, however at physiological concentrations or elevation of free  $Mg^{2+}$ , which accompanies states of energy depletion, it may reduce  $Ca^{2+}$  binding leading to structural perturbations that modify the contractile function of the myofilament. Conversely,  $Mg^{2+}$  can be altered by diseased states such as secondary hyperparathyroidism which results in hypomagnesemia and could potentially impact cardiac contractility (Morsy, Dishmon et al. 2017).

## Conclusions

Our studies provide insights regarding the thermodynamics of metal cation binding to cTnC. The interaction of  $Ca^{2+}$  and  $Mg^{2+}$  with cTnC are characterized by differences consistent with dissimilar ionic radius, number of required coordinating residues, as well as the energetic cost of exposing hydrophobic amino acids to an aqueous environment. In the cell, these differences are functionally necessitated by dissimilar cytosolic prevalence of each cation. Cellular  $Mg^{2+}$  is not necessarily prevalent enough to directly regulate contraction and is not thought to cause a conformational change upon binding to cTnC. However, given the affinities we have observed, its occupation of the binding site may restrict  $Ca^{2+}$  binding. This competition for binding likely favors  $Ca^{2+}$  and is well tolerated,



however elevation of free  $Mg^{2+}$ , which may accompany states of ATP depletion could have relatively significant functional consequence for cardiac force production, for example during ischemic stresses.

## Supplementary Appendix

|                    | <b>x</b> |   | <b>y</b> |   | <b>z</b> |   | <b>-y</b> |   | <b>-x</b> |   | <b>-z</b> |          |
|--------------------|----------|---|----------|---|----------|---|-----------|---|-----------|---|-----------|----------|
| Site I (29-40)     | <b>L</b> | G | <b>A</b> | E | <b>D</b> | G | <b>C</b>  | I | <b>S</b>  | T | K         | <b>E</b> |
| Site II (65-76)    | <b>D</b> | E | <b>D</b> | G | <b>S</b> | G | <b>T</b>  | V | <b>D</b>  | F | D         | <b>E</b> |
| Site III (105-116) | <b>D</b> | K | <b>N</b> | A | <b>D</b> | G | <b>Y</b>  | I | <b>D</b>  | L | D         | <b>E</b> |
| Site IV (141-152)  | <b>D</b> | K | <b>N</b> | N | <b>D</b> | G | <b>R</b>  | I | <b>D</b>  | Y | D         | <b>E</b> |

### Figure S1 - Sequence alignment of the 4 EF hand binding motifs in cTnC

The coordinating residues within EF hands I-IV are shown with the residue number listed in brackets. Each of residues x, y, z, -y, -x, and -z, that make up the helices of the pentagonal bipyramid are indicated. The conservation of the amino acids in each of the coordinating residues between sites II, III, and IV is striking as is the clear differences seen in site I.

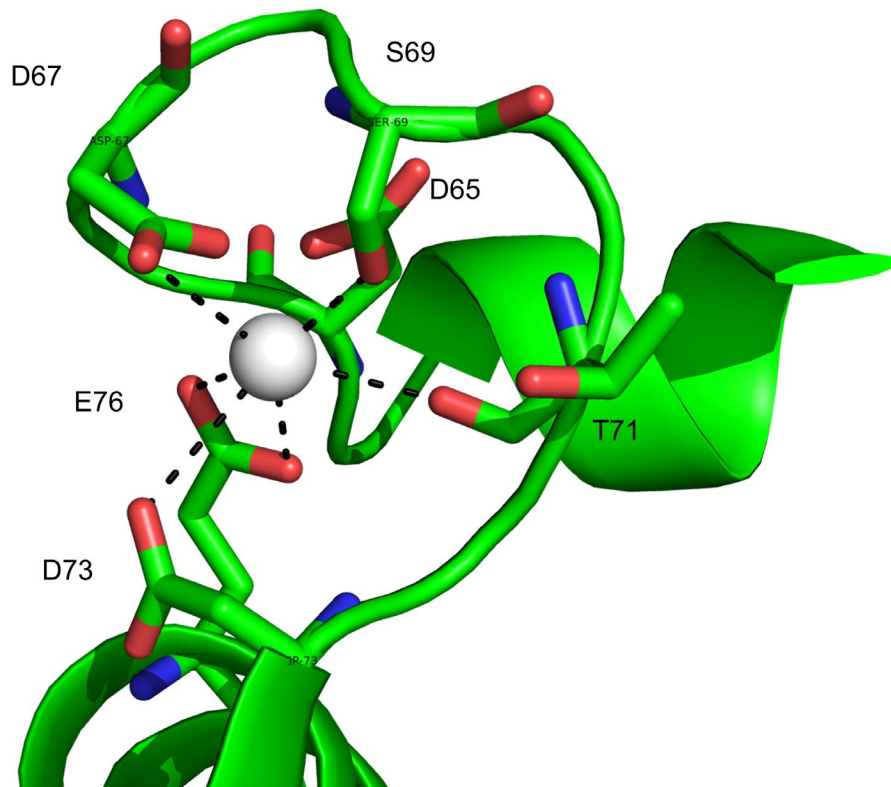

**Figure S2 - Depiction of site II of WT cTnC coordinating a divalent cation**

The D67A/D73A double mutant removes two of the coordinating residues within the EF hand of site II in N-cTnC. The goal of this double mutation was to compare the reduced amount of binding of  $\text{Ca}^{2+}$  and  $\text{Mg}^{2+}$  and to gain insight into the locus of binding for each cation. The figure was generated using PyMOL and adapted from the PDB:1J1E x-ray structure.

**Table S1 - Ion restraints used for thermodynamic integration**

| System             | Ca <sup>2+</sup> to WT N-cTnC |          | Ca <sup>2+</sup> to D67A/D73A N-cTnC |          | Mg <sup>2+</sup> to WT N-cTnC |          | Mg <sup>2+</sup> to D67A/D73A N-cTnC |         |
|--------------------|-------------------------------|----------|--------------------------------------|----------|-------------------------------|----------|--------------------------------------|---------|
|                    | <b>Restraint 1</b>            | ASP67 CG | 2.7 Å                                | ALA67 CB | 4.2 Å                         | ASP67 CG | 2.3 Å                                | THR71 O |
| <b>Restraint 2</b> | SER69 OG                      | 2.6 Å    | SER69 OG                             | 2.6 Å    | SER69 OG                      | 3.7 Å    | SER69 OG                             | 2.0 Å   |
| <b>Restraint 3</b> | GLU76 CD                      | 2.8 Å    | GLU76 CD                             | 2.8 Å    | THR71 OG1                     | 4.5 Å    | ASP65 CG                             | 2.3 Å   |

For each system, 3 restraints to the ion were used. Table shows atom and distance to restrained ion.

**Table S2 - Thermodynamic Parameters for Ca<sup>2+</sup> and Mg<sup>2+</sup> binding to N-cTnC**

| Titration        | N-cTnC Condition         | n | N           | K <sub>A</sub> *10 <sup>3</sup><br>(M <sup>-1</sup> ) | K <sub>d</sub><br>(μM)          | ΔH<br>(kcal*mol <sup>-1</sup> ) | T*ΔS<br>(kcal*mol <sup>-1</sup> ) | ΔG<br>(kcal*mol <sup>-1</sup> ) |
|------------------|--------------------------|---|-------------|-------------------------------------------------------|---------------------------------|---------------------------------|-----------------------------------|---------------------------------|
| Ca <sup>2+</sup> | Apo-State                | 7 | 1.01 ± 0.01 | 66.1 <sup>A</sup><br>± 2.0                            | 15.2 <sup>C</sup><br>± 0.5      | 3.82 <sup>A</sup><br>± 0.04     | 10.39 <sup>A</sup><br>± 0.03      | -6.57 <sup>H</sup><br>± 0.02    |
|                  | D67A/D73A                | 8 | 1.00        | 5.9 <sup>E, F</sup><br>± 0.5                          | 180.3 <sup>C</sup><br>± 16.2    | 0.23 <sup>H, I</sup><br>± 0.02  | 5.36 <sup>G</sup><br>± 0.05       | -5.12 <sup>D</sup><br>± 0.05    |
|                  | + 1 mM Mg <sup>2+</sup>  | 6 | 1.00        | 31.2 <sup>B</sup><br>± 2.7                            | 33.1 <sup>C</sup><br>± 2.57     | 2.47 <sup>B</sup><br>± 0.05     | 8.58 <sup>B</sup><br>± 0.01       | -6.12 <sup>G</sup><br>± 0.05    |
|                  | + 3 mM Mg <sup>2+</sup>  | 7 | 1.00        | 20.9 <sup>C</sup><br>± 1.3                            | 48.9 <sup>C</sup><br>± 2.81     | 1.73 <sup>C</sup><br>± 0.05     | 7.62 <sup>C</sup><br>± 0.03       | -5.89 <sup>G</sup><br>± 0.04    |
|                  | + 5 mM Mg <sup>2+</sup>  | 7 | 1.00        | 14.0 <sup>D</sup><br>± 0.7                            | 72.3 <sup>C</sup><br>± 3.17     | 1.52 <sup>D</sup><br>± 0.05     | 7.17 <sup>D</sup><br>± 0.04       | -5.65 <sup>F</sup><br>± 0.02    |
|                  | + 10 mM Mg <sup>2+</sup> | 7 | 1.00        | 9.7 <sup>D, E</sup><br>± 0.5                          | 105.3 <sup>C</sup><br>± 5.54    | 1.13 <sup>E</sup><br>± 0.04     | 6.57 <sup>E</sup><br>± 0.02       | -5.43 <sup>E, F</sup><br>± 0.03 |
|                  | + 20 mM Mg <sup>2+</sup> | 5 | 1.00        | 8.2 <sup>E</sup><br>± 0.1                             | 122.8 <sup>C</sup><br>± 2.06    | 0.78 <sup>F</sup><br>± 0.04     | 6.13 <sup>F</sup><br>± 0.03       | -5.35 <sup>D, E</sup><br>± 0.01 |
| Mg <sup>2+</sup> | Apo-State                | 5 | 1.00        | 1.54 <sup>F, G</sup><br>± 0.06                        | 652.8 <sup>B, C</sup><br>± 28.4 | 2.64 <sup>B</sup><br>± 0.1      | 6.99 <sup>D</sup><br>± 0.07       | -4.35 <sup>C</sup><br>± 0.03    |
|                  | D67A/D73A                | 5 | 1.00        | 0.90 <sup>F, G</sup><br>± 0.08                        | 1148.6 <sup>A</sup><br>± 95.0   | 0.76 <sup>F</sup><br>± 0.04     | 4.78 <sup>H</sup><br>± 0.03       | -4.02 <sup>B</sup><br>± 0.05    |
|                  | + 1 mM Ca <sup>2+</sup>  | 5 | 1.00        | 0.55 <sup>G</sup><br>± 0.05                           | 1870.0 <sup>A</sup><br>± 171.5  | 0.48 <sup>G</sup><br>± 0.04     | 4.22 <sup>I</sup><br>± 0.03       | -3.73 <sup>A</sup><br>± 0.05    |
|                  | + 2 mM Ca <sup>2+</sup>  | 6 | 1.00        | 0.47 <sup>G</sup><br>± 0.05                           | 2251.7 <sup>A</sup><br>± 261.8  | 0.41 <sup>G, H</sup><br>± 0.04  | 4.04 <sup>I, J</sup><br>± 0.07    | -3.63 <sup>A</sup><br>± 0.07    |
|                  | + 3 mM Ca <sup>2+</sup>  | 8 | 1.00        | 0.52 <sup>G</sup><br>± 0.04                           | 2037.5 <sup>A</sup><br>± 172.2  | 0.24 <sup>H, I</sup><br>± 0.02  | 3.92 <sup>J</sup><br>± 0.04       | -3.69 <sup>A</sup><br>± 0.05    |
|                  | + 5 mM Ca <sup>2+</sup>  | 9 | 1.00        | 0.50 <sup>G</sup><br>± 0.08                           | 2255.8 <sup>A</sup><br>± 220.1  | 0.20 <sup>I</sup><br>± 0.02     | 3.84 <sup>J</sup><br>± 0.06       | -3.64 <sup>A</sup><br>± 0.07    |

In this figure, n indicates the experimental repeats and N indicates the stoichiometry number. 4 mM Ca<sup>2+</sup> and 20 mM Mg<sup>2+</sup> titrations into 200 μM N-cTnC were the baseline conditions. For the Ca<sup>2+</sup> titrations, pre-incubation with 1, 3, 5, 10, and 20 mM Mg<sup>2+</sup> prior to titrations was used to study the site II occupation by both cations. The affinity and enthalpy change associated with the interaction was decreased with increasing amounts of Mg<sup>2+</sup> incubated. For the Mg<sup>2+</sup> titrations, pre-incubation with 1, 2, 3, 5 mM Ca<sup>2+</sup> prior to titrations was used to study the binding of both cations to site II. Increasing the concentration of Ca<sup>2+</sup> decreased the binding affinity of Mg<sup>2+</sup> to site II and decreased the enthalpy change, therefore less Mg<sup>2+</sup> binds N-cTnC in the presence of Ca<sup>2+</sup>. The D67A/D73A mutant was used to reduce the binding of both cations to the EF hand of site II, albeit to a different extent for each. All parameters are displayed as mean ± SEM, with the exception of the stoichiometric ratio for the Mg<sup>2+</sup> binding which was constrained to 1.00 to facilitate fitting. Titrations not linked with the same superscripted letter were significantly different (p<0.05). The first letter of the alphabet indicates the largest mean and each subsequent letter denotes a significantly lower mean.

**Table S3 - Thermodynamic Parameters for Ca<sup>2+</sup> and Mg<sup>2+</sup> binding to full-length cTnC**

|                     | Titrant          | cTnC condition          | n  | N              | K <sub>A</sub><br>*10 <sup>3</sup> (M <sup>-1</sup> ) | K <sub>d</sub><br>(μM)      | ΔH<br>(kcal*mol <sup>-1</sup> ) | T*ΔS<br>(kcal*mol <sup>-1</sup> ) | ΔG<br>(kcal*mol <sup>-1</sup> ) |
|---------------------|------------------|-------------------------|----|----------------|-------------------------------------------------------|-----------------------------|---------------------------------|-----------------------------------|---------------------------------|
| <b>Site II</b>      | Ca <sup>2+</sup> | Apo-State               | 7  | 1.91<br>± 0.07 | 44.3 <sup>A</sup><br>± 1.0                            | 22.7 <sup>B</sup><br>± 0.5  | 3.71 <sup>A</sup><br>± 0.06     | 10.0 <sup>A</sup><br>± 0.07       | -6.29 <sup>C</sup><br>± 0.20    |
|                     | Mg <sup>2+</sup> | Apo-State               | 8  | 32.9<br>± 0.5  | 2.47 <sup>C</sup><br>± 0.05                           | 406.1 <sup>A</sup><br>± 7.9 | 0.091 <sup>D</sup><br>± 0.001   | 4.71 <sup>D</sup><br>± 0.01       | -4.62 <sup>A</sup><br>± 0.11    |
|                     | Ca <sup>2+</sup> | + 1 mM Mg <sup>2+</sup> | 8  | 2.10<br>± 0.05 | 32.4 <sup>B</sup><br>± 0.9                            | 31.0 <sup>B</sup><br>± 0.9  | 1.93 <sup>B</sup><br>± 0.09     | 8.09 <sup>B</sup><br>± 0.08       | -6.16 <sup>B</sup><br>± 0.59    |
|                     | Ca <sup>2+</sup> | + 3 mM Mg <sup>2+</sup> | 10 | 2.96<br>± 0.06 | 29.1 <sup>B</sup><br>± 1.7                            | 35.5 <sup>B</sup><br>± 2.1  | 0.75 <sup>C</sup><br>± 0.03     | 6.83 <sup>C</sup><br>± 0.04       | -6.08 <sup>B</sup><br>± 0.54    |
| <b>Sites III/IV</b> | Ca <sup>2+</sup> | Apo-State               | 7  | 2.19<br>± 0.05 | 8757.1 <sup>B</sup><br>± 951.4                        | 0.12 <sup>B</sup><br>± 0.02 | -8.20 <sup>D</sup><br>± 0.07    | 1.24 <sup>D</sup><br>± 0.07       | -9.44 <sup>B</sup><br>± 0.61    |
|                     | Mg <sup>2+</sup> | Apo-State               | 8  | 4.92<br>± 0.15 | 60.5 <sup>C</sup><br>± 3.0                            | 16.7 <sup>A</sup><br>± 0.7  | -0.23 <sup>A</sup><br>± 0.01    | 6.28 <sup>A</sup><br>± 0.03       | -6.51 <sup>A</sup><br>± 0.31    |
|                     | Ca <sup>2+</sup> | + 1 mM Mg <sup>2+</sup> | 8  | 2.02<br>± 0.04 | 7526.3 <sup>B</sup><br>± 333.5                        | 0.14 <sup>B</sup><br>± 0.01 | -6.87 <sup>C</sup><br>± 0.09    | 2.50 <sup>C</sup><br>± 0.10       | -9.37 <sup>B</sup><br>± 0.50    |
|                     | Ca <sup>2+</sup> | + 3 mM Mg <sup>2+</sup> | 10 | 1.94<br>± 0.04 | 12870.0 <sup>A</sup><br>± 939.6                       | 0.08 <sup>B</sup><br>± 0.01 | -6.19 <sup>B</sup><br>± 0.06    | 3.50 <sup>B</sup><br>± 0.06       | -9.79 <sup>C</sup><br>± 0.26    |

In this figure, n indicates the experimental repeats and N indicates the stoichiometry number. 6 mM Ca<sup>2+</sup> and 40 mM Mg<sup>2+</sup> titrations into 100 μM N-cTnC were the baseline conditions. Ca<sup>2+</sup> was also titrated into protein pre-incubated with 1 and 3 mM Mg<sup>2+</sup> to study the competition for all three binding sites. Binding to site II was analyzed separately from binding to sites III/IV where analysis of variance was used to test for a significant difference in the means for each thermodynamic parameter. At the level of each parameter, Tukey's post hoc test was carried out. The results of this test are indicated by superscripted letters, where conditions with unique letters are significantly different (p < 0.05).

## References

- Allen, K., Y. Y. Xu and W. G. Kerrick (2000). "Ca<sup>2+</sup> measurements in skinned cardiac fibers: effects of Mg<sup>2+</sup> on Ca<sup>2+</sup> activation of force and fiber ATPase." J Appl Physiol (1985) **88**(1): 180-185.
- Allen, T. S., L. D. Yates and A. M. Gordon (1992). "Ca<sup>2+</sup>-dependence of structural changes in troponin-C in demembrated fibers of rabbit psoas muscle." Biophys J **61**(2): 399-409.
- Amano, T., T. Matsubara, J. Watanabe, S. Nakayama and N. Hotta (2000). "Insulin modulation of intracellular free magnesium in heart: involvement of protein kinase C." British journal of pharmacology **130**(4): 731-738.
- Åqvist, J. (1990). "Ion-water interaction potentials derived from free energy perturbation simulations." The Journal of Physical Chemistry **94**(21): 8021-8024.
- Ashley, C. C. and D. G. Moisescu (1977). "Effect of changing the composition of the bathing solutions upon the isometric tension-pCa relationship in bundles of crustacean myofibrils." J Physiol **270**(3): 627-652.
- Bers, D. M. (2000). "Calcium Fluxes Involved in Control of Cardiac Myocyte Contraction." Circulation Research **87**(4): 275-281.
- Best, P. M., S. K. Donaldson and W. G. Kerrick (1977). "Tension in mechanically disrupted mammalian cardiac cells: effects of magnesium adenosine triphosphate." J Physiol **265**(1): 1-17.
- Boresch, S., F. Tettinger, M. Leitgeb and M. Karplus (2003). "Absolute Binding Free Energies: A Quantitative Approach for Their Calculation." The Journal of Physical Chemistry B **107**(35): 9535-9551.
- Bowman, J. D. and S. Lindert (2018). "Molecular Dynamics and Umbrella Sampling Simulations Elucidate Differences in Troponin C Isoform and Mutant Hydrophobic Patch Exposure." **122**(32): 7874-7883.
- Brini, M., T. Cali, D. Ottolini and E. Carafoli (2012). "Calcium pumps: why so many?" Compr Physiol **2**(2): 1045-1060.
- Carafoli, E. and J. Krebs (2016). "Why Calcium? How Calcium Became the Best Communicator." J Biol Chem **291**(40): 20849-20857.
- Cates, M. S., M. B. Berry, E. L. Ho, Q. Li, J. D. Potter and G. N. Phillips, Jr. (1999). "Metal-ion affinity and specificity in EF-hand proteins: coordination geometry and domain plasticity in parvalbumin." Structure **7**(10): 1269-1278.
- Cefaratti, C. and A. M. Romani (2007). "Functional characterization of two distinct Mg<sup>2+</sup> extrusion mechanisms in cardiac sarcolemmal vesicles." Molecular and cellular biochemistry **303**(1-2): 63-72.
- Chao, S. H., Y. Suzuki, J. R. Zysk and W. Y. Cheung (1984). "Activation of calmodulin by various metal cations as a function of ionic radius." Mol Pharmacol **26**(1): 75-82.
- Cheung, J. Y., D. L. Tillotson, R. Yelamarty and R. Scaduto (1989). "Cytosolic free calcium concentration in individual cardiac myocytes in primary culture." American Journal of Physiology-Cell Physiology **256**(6): C1120-C1130.
- Dai, L. J., P. A. Friedman and G. A. Quamme (1997). "Cellular mechanisms of chlorothiazide and cellular potassium depletion on Mg<sup>2+</sup> uptake in mouse distal convoluted tubule cells." Kidney Int **51**(4): 1008-1017.

- Davis, J. P., J. A. Rall, P. J. Reiser, L. B. Smillie and S. B. Tikunova (2002). "Engineering competitive magnesium binding into the first EF-hand of skeletal troponin C." J Biol Chem **277**(51): 49716-49726.
- Dokmanic, I., M. Sikic and S. Tomic (2008). "Metals in proteins: correlation between the metal-ion type, coordination number and the amino-acid residues involved in the coordination." Acta Crystallogr D Biol Crystallogr **64**(Pt 3): 257-263.
- Donaldson, S. K., P. M. Best and G. L. Kerrick (1978). "Characterization of the effects of Mg<sup>2+</sup> on Ca<sup>2+</sup>- and Sr<sup>2+</sup>-activated tension generation of skinned rat cardiac fibers." J Gen Physiol **71**(6): 645-655.
- Donaldson, S. K. and W. G. Kerrick (1975). "Characterization of the effects of Mg<sup>2+</sup> on Ca<sup>2+</sup>- and Sr<sup>2+</sup>-activated tension generation of skinned skeletal muscle fibers." J Gen Physiol **66**(4): 427-444.
- Ebashi, S. and M. Endo (1968). "Calcium ion and muscle contraction." Prog Biophys Mol Biol **18**: 123-183.
- Ebashi, S., Y. Nonomura, K. Kohama, T. Kitazawa and T. Mikawa (1980). "Regulation of muscle contraction by Ca ion." Mol Biol Biochem Biophys **32**: 183-194.
- Ebashi, S. and Y. Ogawa (1988). "Ca<sup>2+</sup> in contractile processes." Biophys Chem **29**(1-2): 137-143.
- Fabiato, A. and F. Fabiato (1975). "Effects of magnesium on contractile activation of skinned cardiac cells." J Physiol **249**(3): 497-517.
- Fagan, T. E. and A. Romani (2001). "α1-Adrenoceptor-induced Mg<sup>2+</sup> extrusion from rat hepatocytes occurs via Na<sup>+</sup>-dependent transport mechanism." American Journal of Physiology-Gastrointestinal and Liver Physiology **280**(6): G1145-G1156.
- Farah, C. S. and F. C. Reinach (1995). "The troponin complex and regulation of muscle contraction." Faseb j **9**(9): 755-767.
- Filatov, V. L., A. G. Katrukha, T. V. Bulargina and N. B. Gusev (1999). "Troponin: structure, properties, and mechanism of functioning." Biochemistry (Mosc) **64**(9): 969-985.
- Follenius, A. and D. Gerard (1984). "Fluorescence investigations of calmodulin hydrophobic sites." Biochem Biophys Res Commun **119**(3): 1154-1160.
- Francois, J. M., C. Gerday, F. G. Prendergast and J. D. Potter (1993). "Determination of the Ca<sup>2+</sup> and Mg<sup>2+</sup> affinity constants of troponin C from eel skeletal muscle and positioning of the single tryptophan in the primary structure." J Muscle Res Cell Motil **14**(6): 585-593.
- Gifford, Jessica L., Michael P. Walsh and Hans J. Vogel (2007). "Structures and metal-ion-binding properties of the Ca<sup>2+</sup>-binding helix-loop-helix EF-hand motifs." Biochemical Journal **405**(2): 199-221.
- Gilli, R., D. Lafitte, C. Lopez, M. Kilhoffer, A. Makarov, C. Briand and J. Haiech (1998). "Thermodynamic analysis of calcium and magnesium binding to calmodulin." Biochemistry **37**(16): 5450-5456.
- Gillis, T. E., T. M. Blumenschein, B. D. Sykes and G. F. Tibbits (2003). "Effect of temperature and the F27W mutation on the Ca<sup>2+</sup> activated structural transition of trout cardiac troponin C." Biochemistry **42**(21): 6418-6426.
- Gillis, T. E., C. R. Marshall, X.-H. Xue, T. J. Borgford and G. F. Tibbits (2000). "Ca<sup>2+</sup> binding to cardiac troponin C: effects of temperature and pH on mammalian and salmonid isoforms." American Journal of Physiology-Regulatory, Integrative and Comparative Physiology **279**(5): R1707-R1715.
- Gillis, T. E., C. D. Moyes and G. F. Tibbits (2003). "Sequence mutations in teleost cardiac troponin C that are permissive of high Ca<sup>2+</sup> affinity of site II." American Journal of Physiology-Cell Physiology **284**(5): C1176-C1184.



- Godt, R. E. (1974). "Calcium-activated tension of skinned muscle fibers of the frog. Dependence on magnesium adenosine triphosphate concentration." J Gen Physiol **63**(6): 722-739.
- Godt, R. E. and B. D. Lindley (1982). "Influence of temperature upon contractile activation and isometric force production in mechanically skinned muscle fibers of the frog." J Gen Physiol **80**(2): 279-297.
- Godt, R. E. and J. L. Morgan (1984). "Contractile responses to MgATP and pH in a thick filament regulated muscle: studies with skinned scallop fibers." Adv Exp Med Biol **170**: 569-572.
- Grossoehme, N. E., A. M. Spuches and D. E. Wilcox (2010). "Application of isothermal titration calorimetry in bioinorganic chemistry." J Biol Inorg Chem **15**(8): 1183-1191.
- Harding, M. M. (2002). "Metal-ligand geometry relevant to proteins and in proteins: sodium and potassium." Acta Crystallogr D Biol Crystallogr **58**(Pt 5): 872-874.
- Hazard, A. L., S. C. Kohout, N. L. Stricker, J. A. Putkey and J. J. Falke (1998). "The kinetic cycle of cardiac troponin C: calcium binding and dissociation at site II trigger slow conformational rearrangements." Protein Science **7**(11): 2451-2459.
- Herzberg, O. and M. N. James (1985). "Structure of the calcium regulatory muscle protein troponin-C at 2.8 Å resolution."
- Holroyde, M., S. Robertson, J. Johnson, R. Solaro and J. Potter (1980). "The calcium and magnesium binding sites on cardiac troponin and their role in the regulation of myofibrillar adenosine triphosphatase." Journal of Biological Chemistry **255**(24): 11688-11693.
- Hongo, K., M. Konishi and S. Kurihara (1994). "Cytoplasmic free Mg<sup>2+</sup> in rat ventricular myocytes studied with the fluorescent indicator fura-2." Jpn J Physiol **44**(4): 357-378.
- Houdusse, A., M. L. Love, R. Dominguez, Z. Grabarek and C. Cohen (1997). "Structures of four Ca<sup>2+</sup>-bound troponin C at 2.0 Å resolution: further insights into the Ca<sup>2+</sup>-switch in the calmodulin superfamily." Structure **5**(12): 1695-1711.
- Howarth, F., J. Waring, B. Hustler and J. Singh (1994). "Effects of extracellular magnesium and beta adrenergic stimulation on contractile force and magnesium mobilization in the isolated rat heart." Magnesium research **7**(3-4): 187-197.
- Johnson, J. D., S. C. Charlton and J. D. Potter (1979). "A fluorescence stopped flow analysis of Ca<sup>2+</sup> exchange with troponin C." J Biol Chem **254**(9): 3497-3502.
- Johnson, J. D., J. H. Collins, S. P. Robertson and J. D. Potter (1980). "A fluorescent probe study of Ca<sup>2+</sup> binding to the Ca<sup>2+</sup>-specific sites of cardiac troponin and troponin C." Journal of Biological Chemistry **255**(20): 9635-9640.
- Johnson, J. D., R. J. Nakkula, C. Vasulka and L. B. Smillie (1994). "Modulation of Ca<sup>2+</sup> exchange with the Ca(2+)-specific regulatory sites of troponin C." J Biol Chem **269**(12): 8919-8923.
- Johnson, R. A., L. M. Fulcher, K. Vang, C. D. Palmer, N. E. Grossoehme and A. M. Spuches (2019). "In depth, thermodynamic analysis of Ca(2+) binding to human cardiac troponin C: Extracting buffer-independent binding parameters." Biochim Biophys Acta Proteins Proteom **1867**(4): 359-366.
- Kawasaki, Y. and J.-P. van Eerd (1972). "The effect of Mg<sup>++</sup> on the conformation of the Ca<sup>+++</sup>-binding component of troponin." Biochemical and Biophysical Research Communications **49**(4): 898-905.
- Kerrick, W. G. L. and S. K. B. Donaldson (1975). "The comparative effects of [Ca<sup>2+</sup>] and [Mg<sup>2+</sup>] on tension generation in the fibers of skinned frog skeletal muscle and mechanically disrupted rat ventricular cardiac muscle." Pflügers Archiv **358**(3): 195-201.
- Kirschenlohr, H. L., A. A. Grace, J. I. Vandenberg, J. C. Metcalfe and G. A. Smith (2000). "Estimation of systolic and diastolic free intracellular Ca<sup>2+</sup> by titration of Ca<sup>2+</sup> buffering in the ferret heart." Biochem J **346 Pt 2**: 385-391.

- Kohama, K. (1980). "Role of the high affinity Ca binding sites of cardiac and fast skeletal troponins." J Biochem **88**(2): 591-599.
- Kometani, K. and K. Yamada (1983). "Enthalpy, entropy and heat capacity changes induced by binding of calcium ions to cardiac troponin C." Biochemical and biophysical research communications **114**(1): 162-167.
- L DeLano, W. (2002). The PyMOL Molecular Graphics System (2002) DeLano Scientific, Palo Alto, CA, USA. <http://www.pymol.org>.
- Laires, M. J., C. P. Monteiro and M. Bicho (2004). "Role of cellular magnesium in health and human disease." Front Biosci **9**: 262-276.
- Leavis, P. and E. L. Kraft (1978). "Calcium binding to cardiac troponin C." Archives of biochemistry and biophysics **186**(2): 411-415.
- Leelananda, S. P. and S. Lindert (2016). "Computational methods in drug discovery." Beilstein J Org Chem **12**: 2694-2718.
- Lewit-Bentley, A. and S. Rety (2000). "EF-hand calcium-binding proteins." Curr Opin Struct Biol **10**(6): 637-643.
- Li, A. Y., C. M. Stevens, B. Liang, K. Rayani, S. Little, J. Davis and G. F. Tibbits (2013). "Familial hypertrophic cardiomyopathy related cardiac troponin C L29Q mutation alters length-dependent activation and functional effects of phosphomimetic troponin I\*." Biochemistry **52**(12): 2015-2024.
- Li, M. X., M. Chandra, J. R. Pearlstone, K. I. Racher, G. Trigo-Gonzalez, T. Borgford, C. M. Kay and L. B. Smillie (1994). "Properties of isolated recombinant N and C domains of chicken troponin C." Biochemistry **33**(4): 917-925.
- Li, M. X., L. Spyrapoulos and B. D. Sykes (1999). "Binding of Cardiac Troponin-1147-163 Induces a Structural Opening in Human Cardiac Troponin-C." Biochemistry **38**(26): 8289-8298.
- Li, P., B. P. Roberts, D. K. Chakravorty and K. M. Merz, Jr. (2013). "Rational Design of Particle Mesh Ewald Compatible Lennard-Jones Parameters for +2 Metal Cations in Explicit Solvent." J Chem Theory Comput **9**(6): 2733-2748.
- Liang, B., F. Chung, Y. Qu, D. Pavlov, T. E. Gillis, S. B. Tikunova, J. P. Davis and G. F. Tibbits (2008). "Familial hypertrophic cardiomyopathy-related cardiac troponin C mutation L29Q affects Ca<sup>2+</sup> binding and myofilament contractility." Physiological genomics **33**(2): 257-266.
- Linse, S. and S. Forsen (1995). "Determinants that govern high-affinity calcium binding." Adv Second Messenger Phosphoprotein Res **30**: 89-151.
- Lockless, S. W., M. Zhou and R. MacKinnon (2007). "Structural and thermodynamic properties of selective ion binding in a K<sup>+</sup> channel." PLoS Biol **5**(5): e121.
- Maguire, M. E. (2006). "Magnesium transporters: properties, regulation and structure." Front Biosci **11**: 3149-3163.
- Maier, J. A., C. Martinez, K. Kasavajhala, L. Wickstrom, K. E. Hauser and C. Simmerling (2015). "ff14SB: Improving the Accuracy of Protein Side Chain and Backbone Parameters from ff99SB." J Chem Theory Comput **11**(8): 3696-3713.
- Malmendal, A., S. Linse, J. Evenas, S. Forsen and T. Drakenberg (1999). "Battle for the EF-hands: magnesium-calcium interference in calmodulin." Biochemistry **38**(36): 11844-11850.
- Morimoto, S. (1991). "Effect of myosin cross-bridge interaction with actin on the Ca<sup>2+</sup>-binding properties of troponin C in fast skeletal myofibrils." The Journal of Biochemistry **109**(1): 120-126.

- Morsy, M. S., D. A. Dishmon, N. Garg and K. T. Weber (2017). "Secondary hyperparathyroidism in heart failure." The American journal of the medical sciences **354**(4): 335-338.
- Murray, A. C. and C. M. Kay (1972). "Hydrodynamic and optical properties of troponin A. Demonstration of a conformational change upon binding calcium ion." Biochemistry **11**(14): 2622-2627.
- Nara, M., H. Morii and M. Tanokura (2013). "Infrared study of synthetic peptide analogues of the calcium-binding site III of troponin C: The role of helix F of an EF-hand motif." Biopolymers **99**(5): 342-347.
- Ogawa, Y. (1985). "Calcium binding to troponin C and troponin: effects of Mg<sup>2+</sup>, ionic strength and pH." The Journal of Biochemistry **97**(4): 1011-1023.
- Pan, B. S. and R. J. Solaro (1987). "Calcium-binding properties of troponin C in detergent-skinned heart muscle fibers." J Biol Chem **262**(16): 7839-7849.
- Panteva, M. T., G. M. Giambasu and D. M. York (2015). "Comparison of structural, thermodynamic, kinetic and mass transport properties of Mg(2+) ion models commonly used in biomolecular simulations." J Comput Chem **36**(13): 970-982.
- Parmacek, M. S. and R. J. Solaro (2004). "Biology of the troponin complex in cardiac myocytes." Prog Cardiovasc Dis **47**(3): 159-176.
- Pinto, J. R., M. S. Parvatiyar, M. A. Jones, J. Liang, M. J. Ackerman and J. D. Potter (2009). "A functional and structural study of troponin C mutations related to hypertrophic cardiomyopathy." J Biol Chem **284**(28): 19090-19100.
- Potter, J. D. and J. Gergely (1975). "The calcium and magnesium binding sites on troponin and their role in the regulation of myofibrillar adenosine triphosphatase." Journal of Biological Chemistry **250**(12): 4628-4633.
- Potter, J. D., S. P. Robertson and J. D. Johnson (1981). "Magnesium and the regulation of muscle contraction." Fed Proc **40**(12): 2653-2656.
- Ramos, C. H. (1999). "Mapping subdomains in the C-terminal region of troponin I involved in its binding to troponin C and to thin filament." J Biol Chem **274**(26): 18189-18195.
- Reid, R. E. and R. M. Procyshyn (1995). "Engineering magnesium selectivity in the helix-loop-helix calcium-binding motif." Arch Biochem Biophys **323**(1): 115-119.
- Robertson, S., J. D. Johnson and J. Potter (1981). "The time-course of Ca<sup>2+</sup> exchange with calmodulin, troponin, parvalbumin, and myosin in response to transient increases in Ca<sup>2+</sup>." Biophysical journal **34**(3): 559.
- Rocklin, G. J., D. L. Mobley, K. A. Dill and P. H. Hunenberger (2013). "Calculating the binding free energies of charged species based on explicit-solvent simulations employing lattice-sum methods: an accurate correction scheme for electrostatic finite-size effects." J Chem Phys **139**(18): 184103.
- Romani, A. and A. Scarpa (1992). "Regulation of cell magnesium." Arch Biochem Biophys **298**(1): 1-12.
- Romani, A. M. P. (2011). Intracellular magnesium homeostasis. Magnesium in the Central Nervous System. R. Vink and M. Nechifor. Adelaide (AU), University of Adelaide Press
- (c) 2011 The Authors.
- Sacco, C., R. A. Skowronsky, S. Gade, J. M. Kenney and A. M. Spuches (2012). "Calorimetric investigation of copper(II) binding to Abeta peptides: thermodynamics of coordination plasticity." J Biol Inorg Chem **17**(4): 531-541.
- Schober, T., S. Huke, R. Venkataraman, O. Gryshchenko, D. Kryshtal, H. S. Hwang, F. J. Baudenbacher and B. C. Knollmann (2012). "Myofilament Ca sensitization increases cytosolic Ca binding affinity,

- alters intracellular Ca homeostasis, and causes pause-dependent Ca-triggered arrhythmia." Circulation research **111**(2): 170-179.
- Seamon, K. B., D. J. Hartshorne and A. A. Bothner-By (1977). "Ca<sup>2+</sup> and Mg<sup>2+</sup> dependent conformations of troponin C as determined by 1H and 19F nuclear magnetic resonance." Biochemistry **16**(18): 4039-4046.
- She, M., W. J. Dong, P. K. Umeda and H. C. Cheung (1998). "Tryptophan mutants of troponin C from skeletal muscle: an optical probe of the regulatory domain." European journal of biochemistry **252**(3): 600-607.
- Sia, S. K., M. X. Li, L. Spyrapopoulos, S. M. Gagné, W. Liu, J. A. Putkey and B. D. Sykes (1997). "Structure of cardiac muscle troponin C unexpectedly reveals a closed regulatory domain." Journal of Biological Chemistry **272**(29): 18216-18221.
- Siddiqui, J. K., S. B. Tikunova, S. D. Walton, B. Liu, M. Meyer, P. P. de Tombe, N. Neilson, P. M. Kekenus-Huskey, H. E. Salhi, P. M. Janssen, B. J. Biesiadecki and J. P. Davis (2016). "Myofilament Calcium Sensitivity: Consequences of the Effective Concentration of Troponin I." Front Physiol **7**: 632.
- Skowronsky, R. A., M. Schroeter, T. Baxley, Y. Li, J. M. Chalovich and A. M. Spuches (2013). "Thermodynamics and molecular dynamics simulations of calcium binding to the regulatory site of human cardiac troponin C: evidence for communication with the structural calcium binding sites." JBIC Journal of Biological Inorganic Chemistry **18**(1): 49-58.
- Slupsky, C. M. and B. D. Sykes (1995). "NMR solution structure of calcium-saturated skeletal muscle troponin C." Biochemistry **34**(49): 15953-15964.
- Solaro, R. J. and J. S. Shiner (1976). "Modulation of Ca<sup>2+</sup> control of dog and rabbit cardiac myofibrils by Mg<sup>2+</sup>. Comparison with rabbit skeletal myofibrils." Circ Res **39**(1): 8-14.
- Spyrapopoulos, L., M. X. Li, S. K. Sia, S. M. Gagné, M. Chandra, R. J. Solaro and B. D. Sykes (1997). "Calcium-induced structural transition in the regulatory domain of human cardiac troponin C." Biochemistry **36**(40): 12138-12146.
- Steinbrecher, T., I. Joung and D. A. Case (2011). "Soft-core potentials in thermodynamic integration: comparing one- and two-step transformations." J Comput Chem **32**(15): 3253-3263.
- Stephenson, D. G. and D. A. Williams (1982). "Effects of sarcomere length on the force-pCa relation in fast- and slow-twitch skinned muscle fibres from the rat." J Physiol **333**: 637-653.
- Stevens, C. M., K. Rayani, C. E. Genge, G. Singh, B. Liang, J. M. Roller, C. Li, A. Y. Li, D. P. Tieleman and F. van Petegem (2016). "Characterization of Zebrafish Cardiac and Slow Skeletal Troponin C Paralogs by MD Simulation and ITC." Biophysical Journal **111**(1): 38-49.
- Stevens, C. M., K. Rayani, G. Singh, B. Lotfalimalasi, D. P. Tieleman and G. F. Tibbits (2017). "Changes in the dynamics of the cardiac troponin C molecule explain the effects of Ca<sup>2+</sup>-sensitizing mutations." Journal of Biological Chemistry **292**(28): 11915-11926.
- Strynadka, N. C. and M. N. James (1989). "Crystal structures of the helix-loop-helix calcium-binding proteins." Annu Rev Biochem **58**: 951-998.
- Sturtevant, J. M. (1977). "Heat capacity and entropy changes in processes involving proteins." Proc Natl Acad Sci U S A **74**(6): 2236-2240.
- Sundaralingam, M., R. Bergstrom, G. Strasburg, S. T. Rao, P. Roychowdhury, M. Greaser and B. C. Wang (1985). "Molecular structure of troponin C from chicken skeletal muscle at 3-angstrom resolution." Science **227**(4689): 945-948.

- Tanaka, H., H. Takahashi and T. Ojima (2013). "Ca<sup>2+</sup>-binding properties and regulatory roles of lobster troponin C sites II and IV." FEBS Lett **587**(16): 2612-2616.
- Tessman, P. A. and A. Romani (1998). "Acute effect of EtOH on Mg<sup>2+</sup> homeostasis in liver cells: evidence for the activation of an Na<sup>+</sup>/Mg<sup>2+</sup> exchanger." Am J Physiol **275**(5): G1106-1116.
- Tikunova, S. B., D. J. Black, J. D. Johnson and J. P. Davis (2001). "Modifying Mg<sup>2+</sup> binding and exchange with the N-terminal of calmodulin." Biochemistry **40**(11): 3348-3353.
- Tikunova, S. B. and J. P. Davis (2004). "Designing calcium-sensitizing mutations in the regulatory domain of cardiac troponin C." Journal of Biological Chemistry **279**(34): 35341-35352.
- van Eerd, J. P. and K. Takahshi (1976). "Determination of the complete amino acid sequence of bovine cardiac troponin C." Biochemistry **15**(5): 1171-1180.
- Vormann, J. and T. Günther (1987). "Amiloride-sensitive net Mg<sup>2+</sup> efflux from isolated perfused rat hearts." Magnesium **6**(4): 220-224.
- Wang, K., M. Brohus, C. Holt, M. T. Overgaard, R. Wimmer and F. Van Petegem (2020). "Arrhythmia mutations in calmodulin can disrupt cooperativity of Ca<sup>2+</sup> binding and cause misfolding." The Journal of Physiology **598**(6): 1169-1186.
- Wang, S.-Q., Y.-H. Huang, K.-S. Liu and Z.-Q. Zhou (1997). "Dependence of myocardial hypothermia tolerance on sources of activator calcium." Cryobiology **35**(3): 193-200.
- Wilcox, D. E. (2008). "Isothermal titration calorimetry of metal ions binding to proteins: An overview of recent studies." Inorganica Chimica Acta **361**(4): 857-867.
- Wnuk, W., M. Schoeclin and E. A. Stein (1984). "Regulation of actomyosin ATPase by a single calcium-binding site on troponin C from crayfish." J Biol Chem **259**(14): 9017-9023.
- Wolf, F. I., A. Di Francesco, V. Covacci, D. Corda and A. Cittadini (1996). "Regulation of intracellular magnesium in ascites cells: Involvement of different regulatory pathways." Archives of biochemistry and biophysics **331**(2): 194-200.
- Yamada, K. (1978). "The enthalpy titration of troponin C with calcium." Biochimica et Biophysica Acta (BBA)-Protein Structure **535**(2): 342-347.
- Yamada, K. (2003). "Calcium binding to troponin C as a primary step of the regulation of contraction. A microcalorimetric approach." Adv Exp Med Biol **538**: 203-212; discussion 213.
- Yamada, K. and K. Kometani (1982). "The changes in heat capacity and entropy of troponin C induced by calcium binding." The Journal of Biochemistry **92**(5): 1505-1517.
- Yap, K. L., J. B. Ames, M. B. Swindells and M. Ikura (1999). "Diversity of conformational states and changes within the EF-hand protein superfamily." Proteins **37**(3): 499-507.
- Yumoto, F., M. Nara, H. Kagi, W. Iwasaki, T. Ojima, K. Nishita, K. Nagata and M. Tanokura (2001). "Coordination structures of Ca<sup>2+</sup> and Mg<sup>2+</sup> in Akazara scallop troponin C in solution. FTIR spectroscopy of side-chain COO<sup>-</sup> groups." Eur J Biochem **268**(23): 6284-6290.
- Zot, A. S. and J. D. Potter (1987). "Structural aspects of troponin-tropomyosin regulation of skeletal muscle contraction." Annual review of biophysics and biophysical chemistry **16**(1): 535-559.
